# Supplementary material
Source: PubMed Central journal article supplement (PMC6837174)

### Compound 1

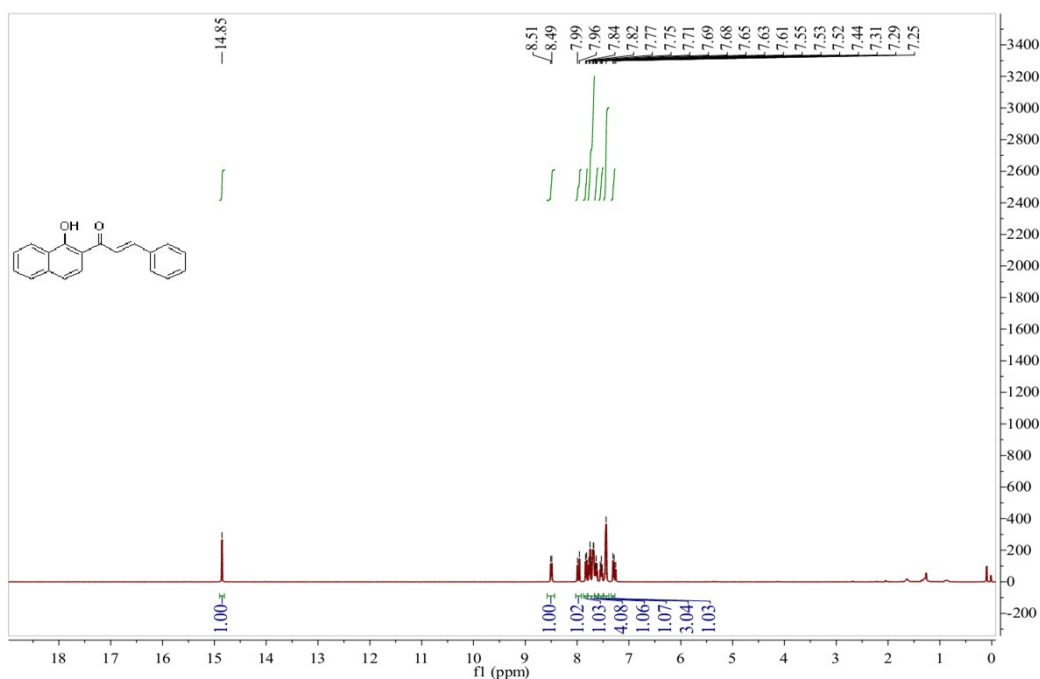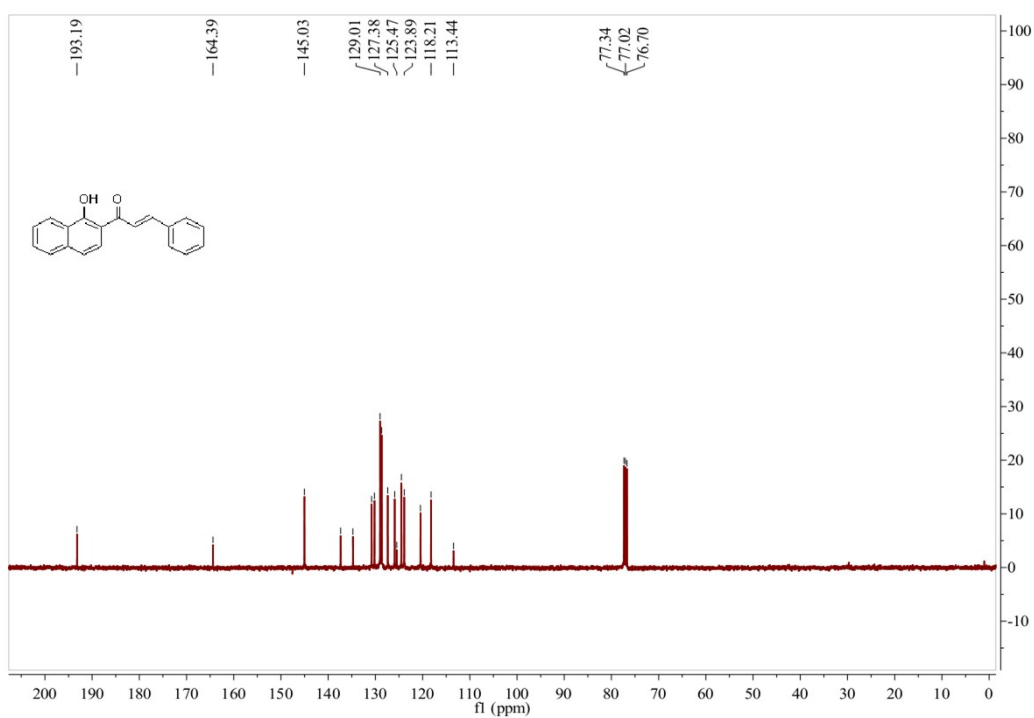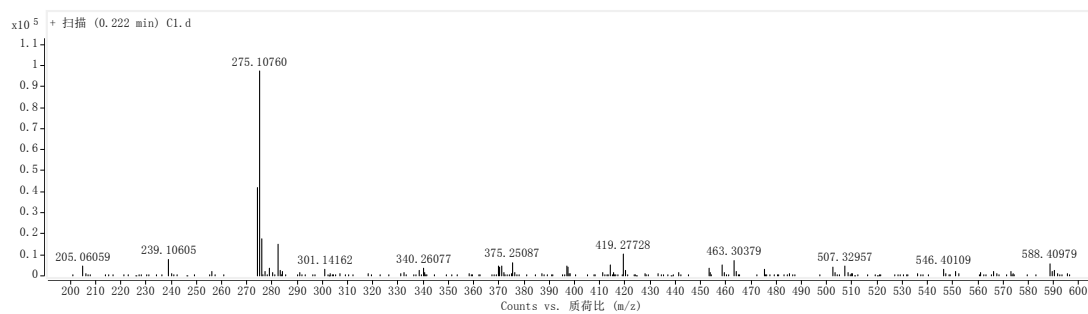

# Compound 2

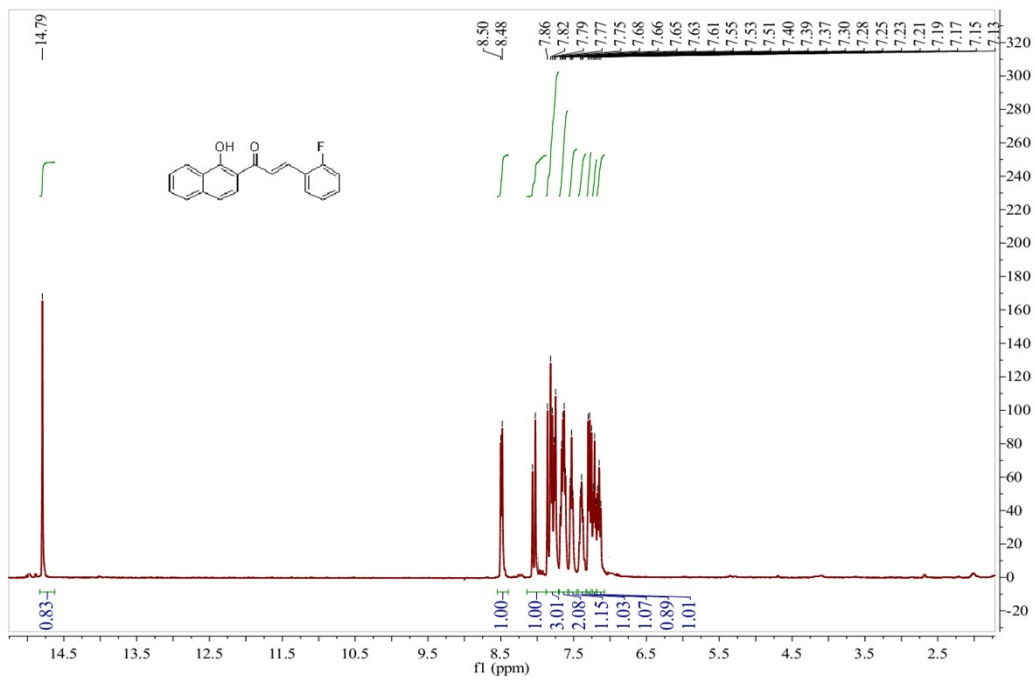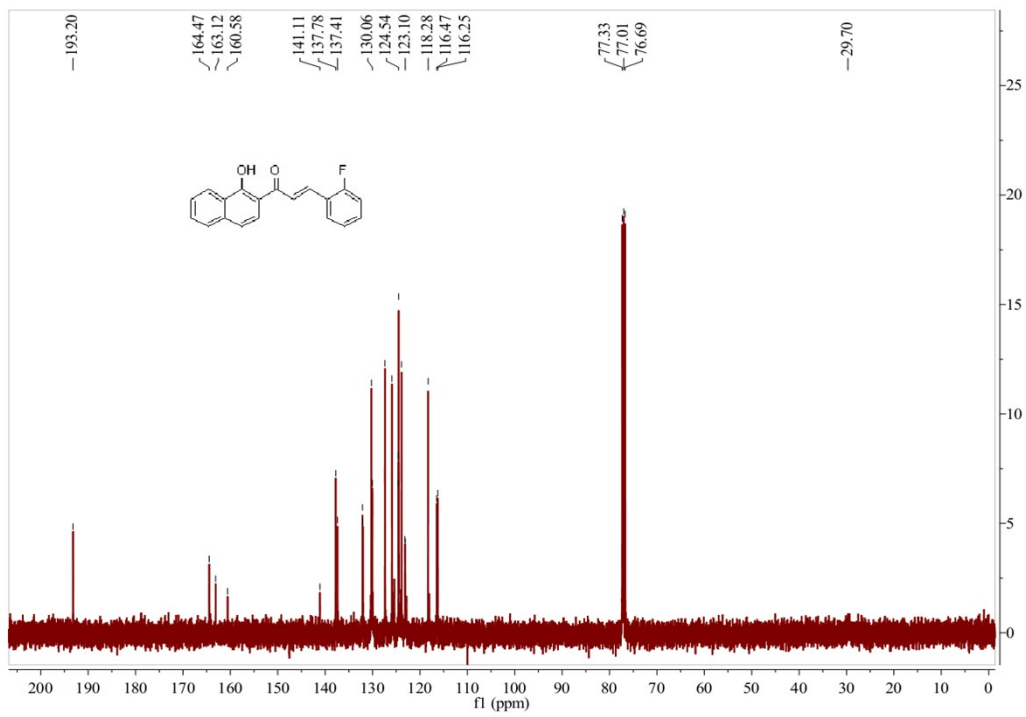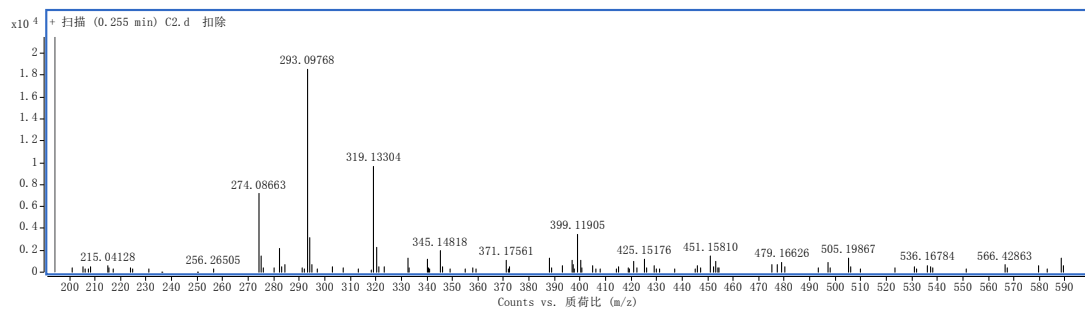

# Compound 3

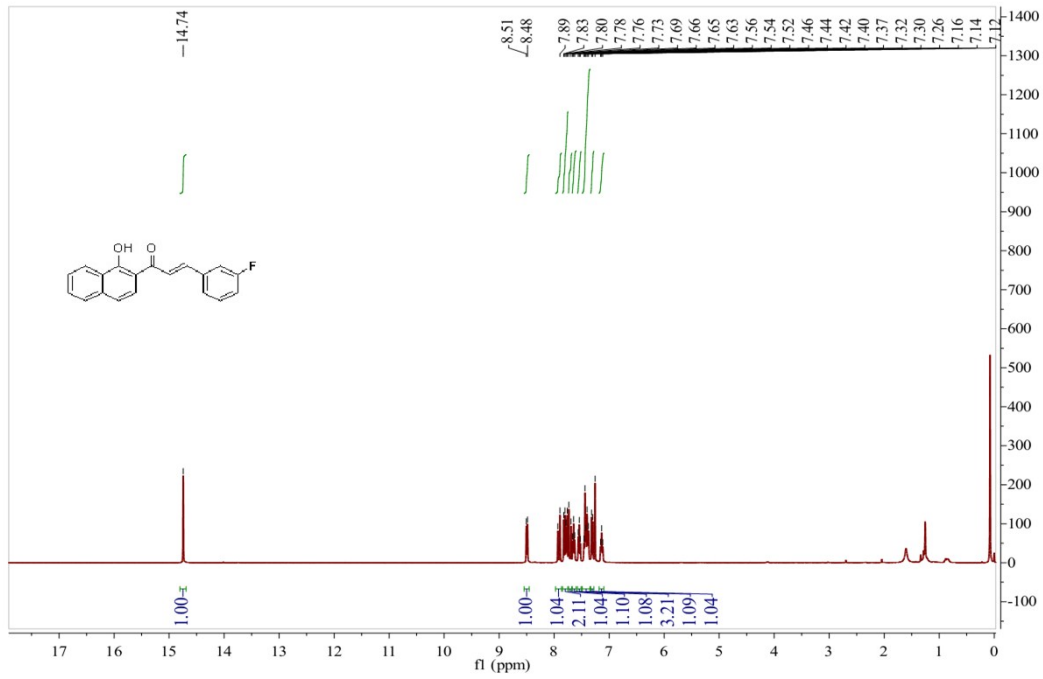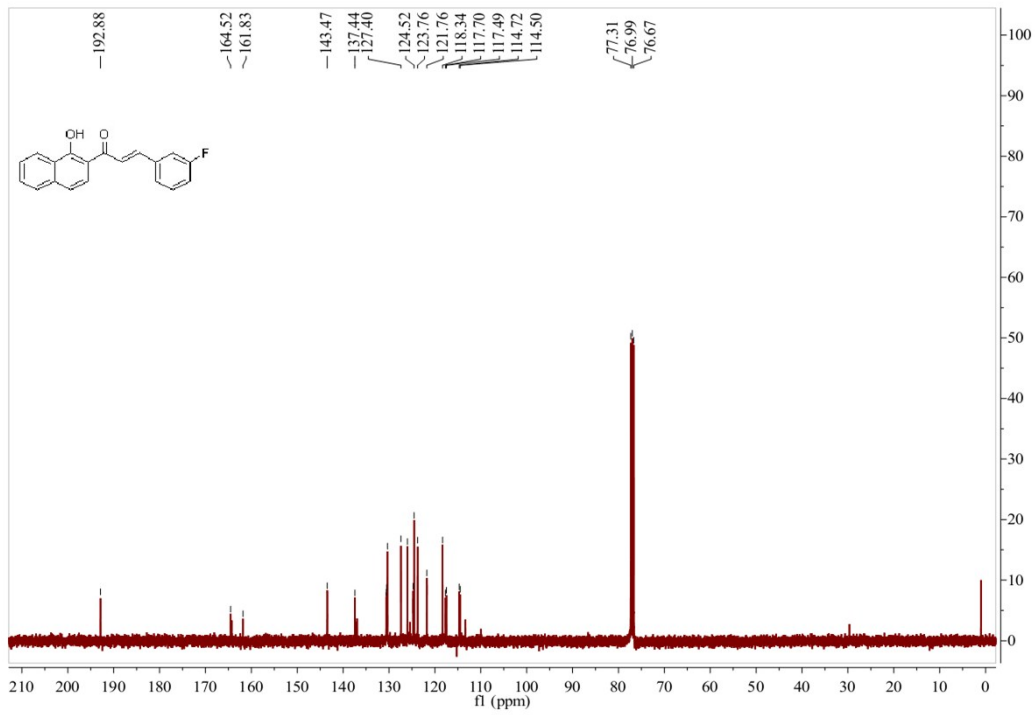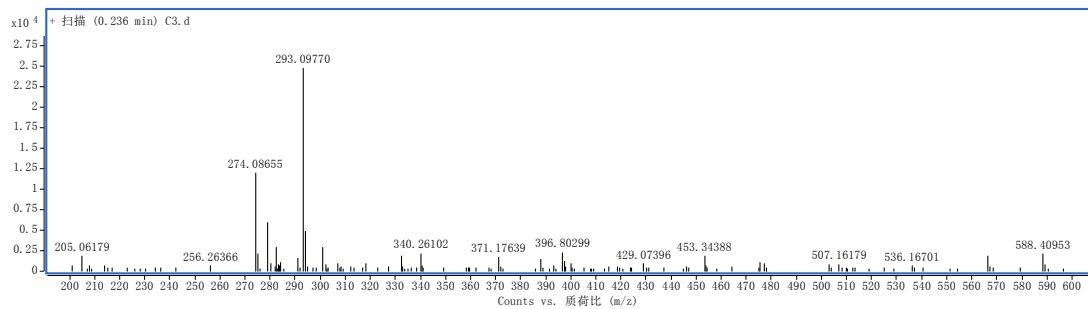

# Compound 4

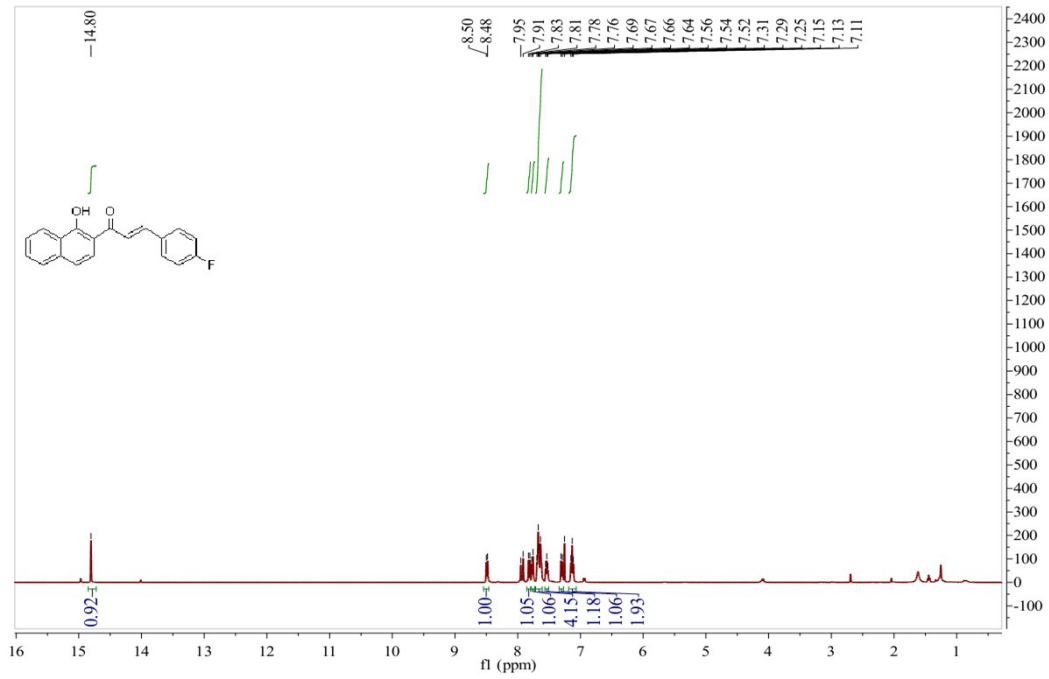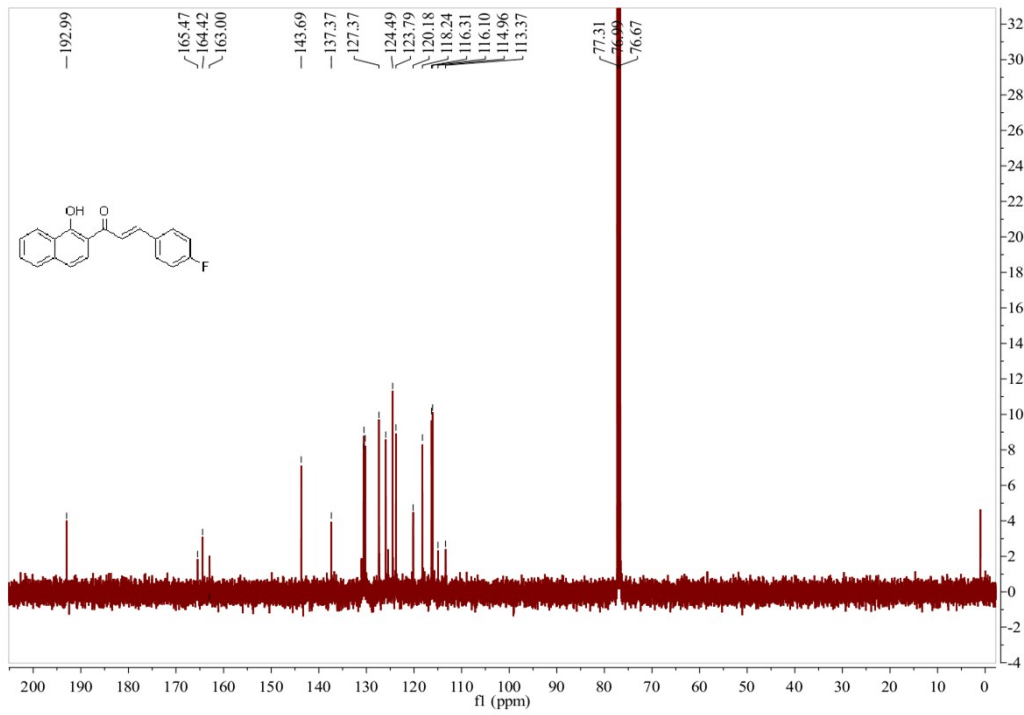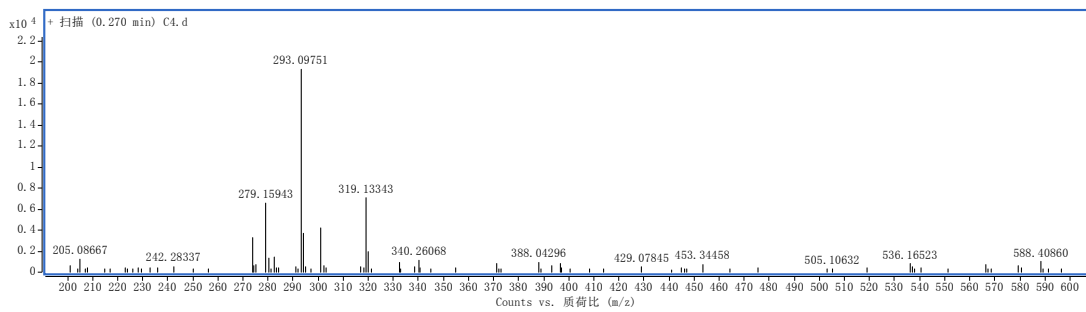

# Compound 5

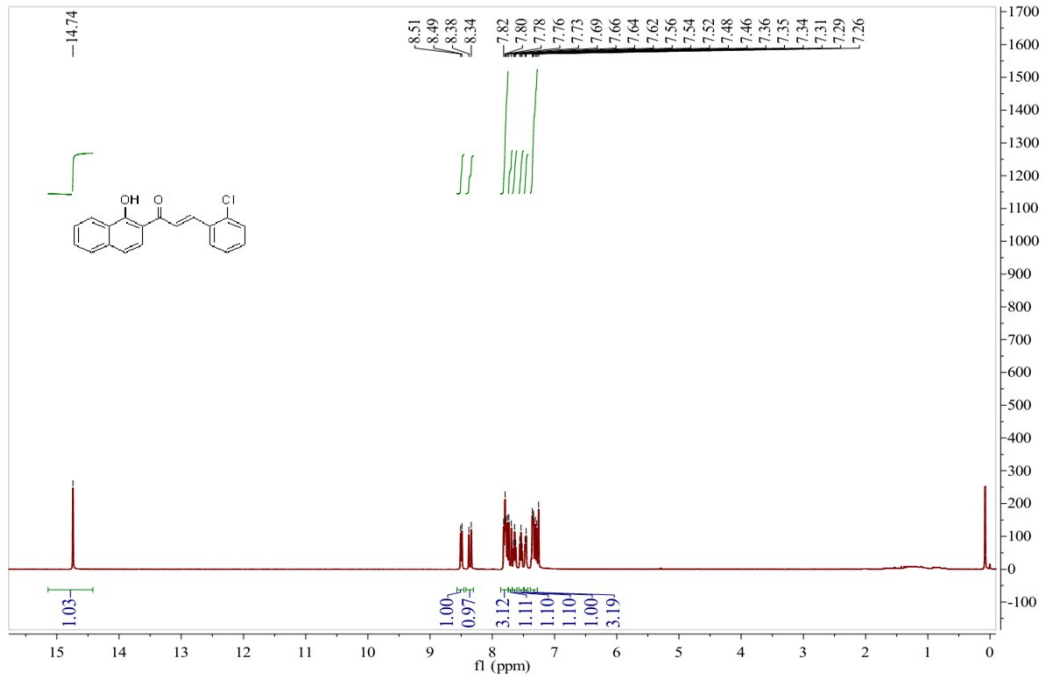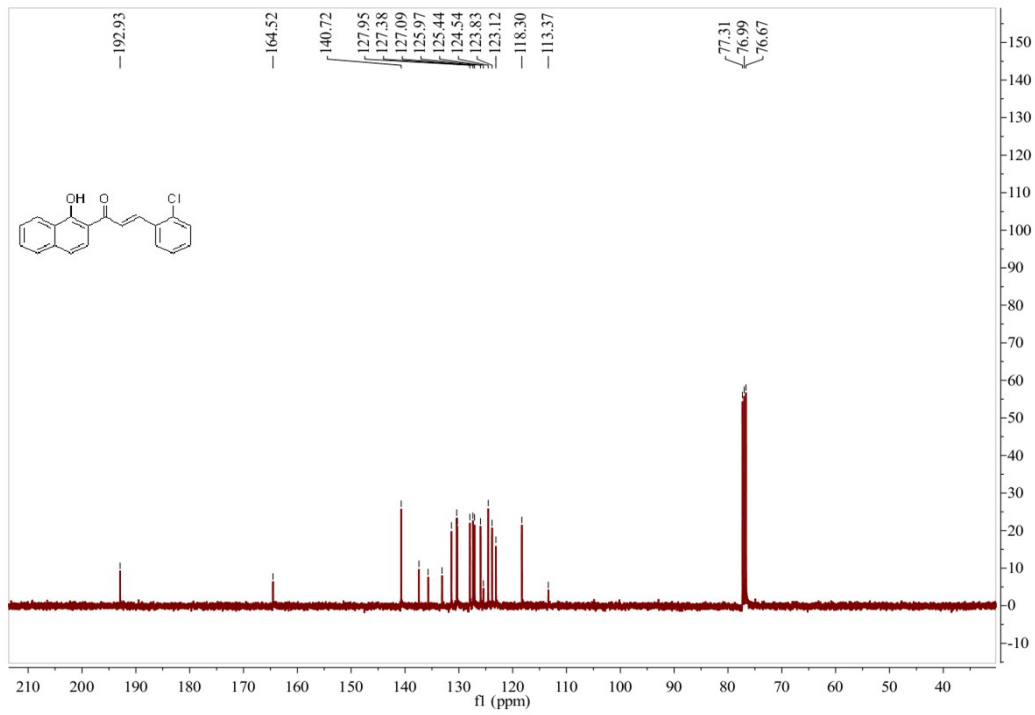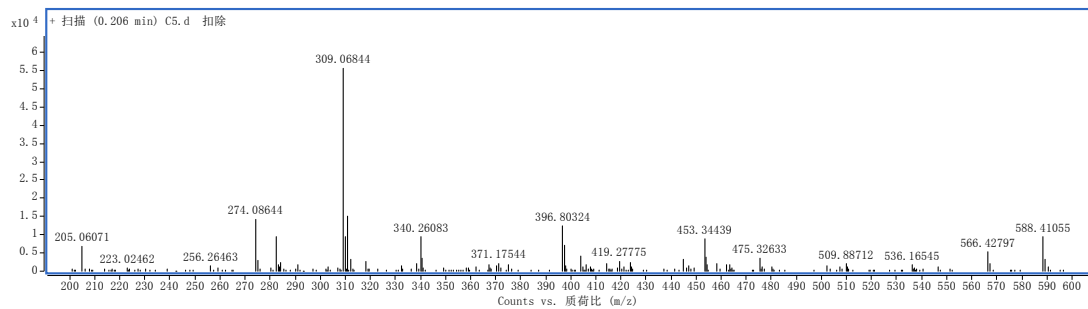

# Compound 6

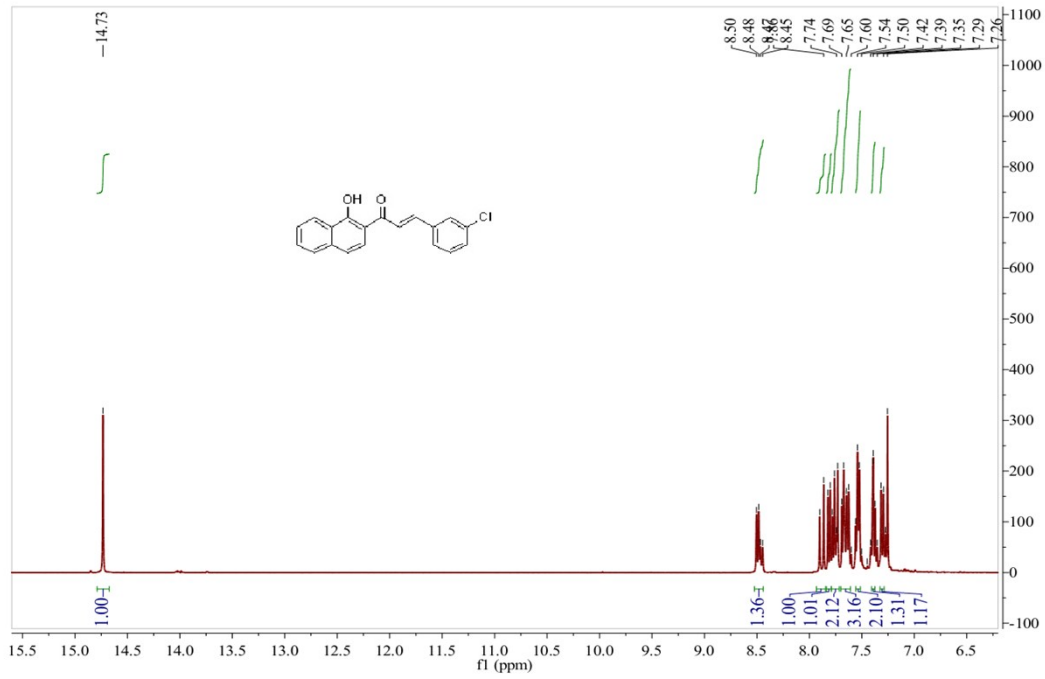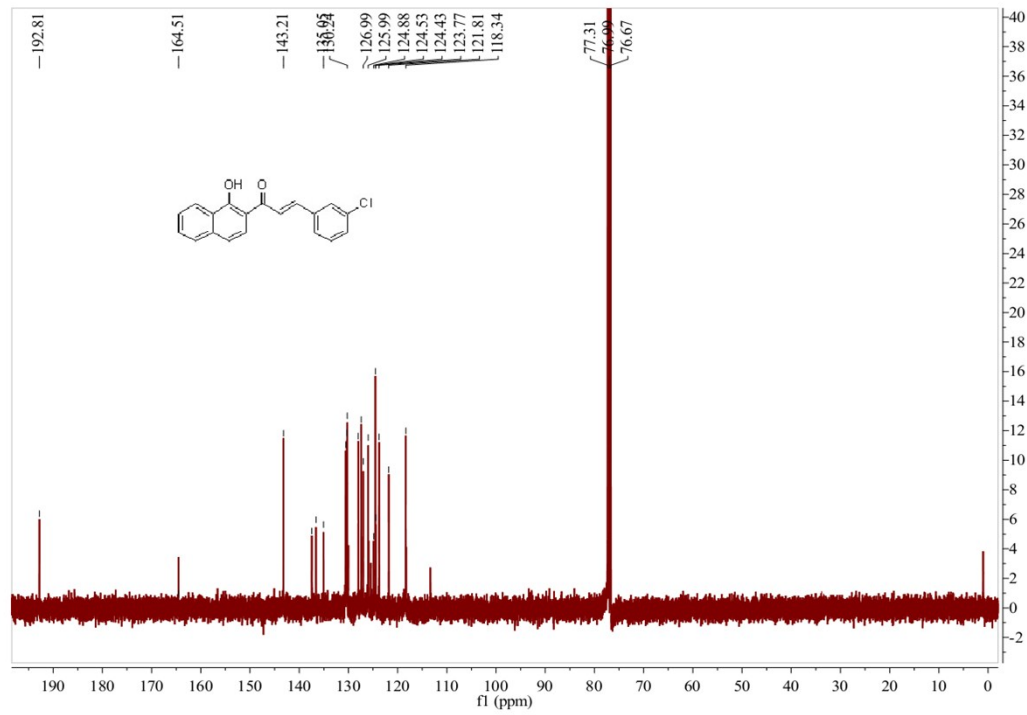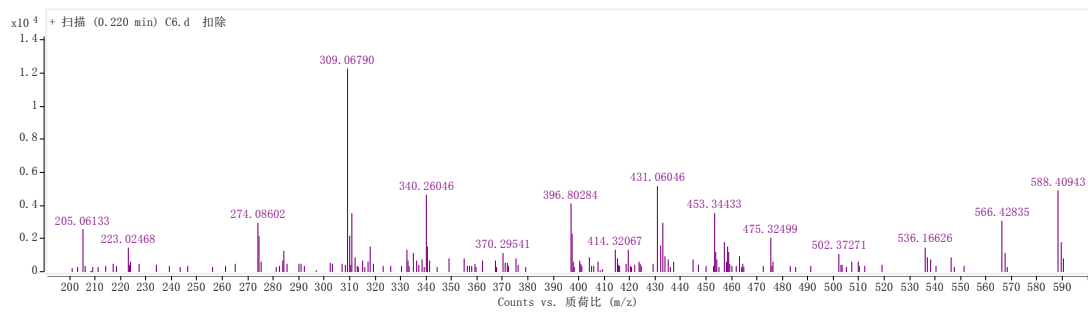

# Compound 7

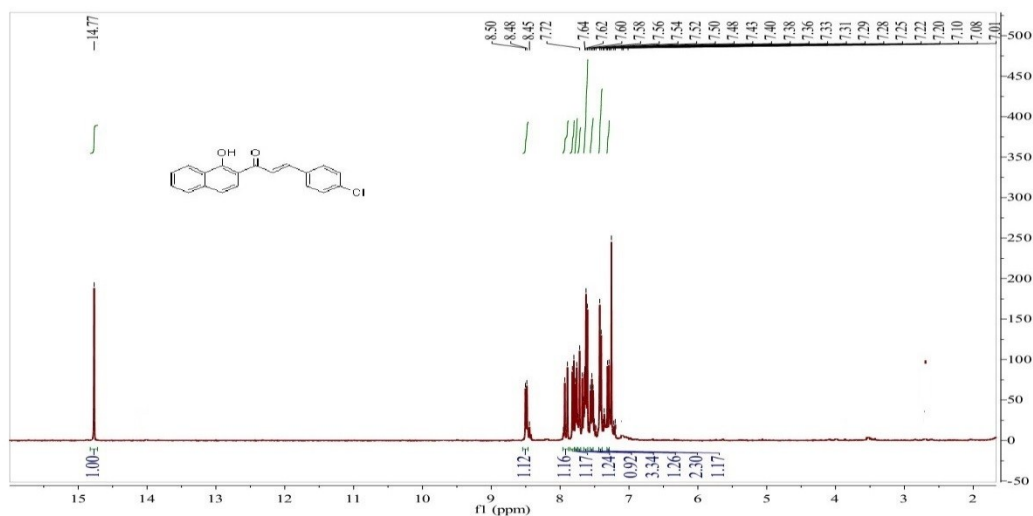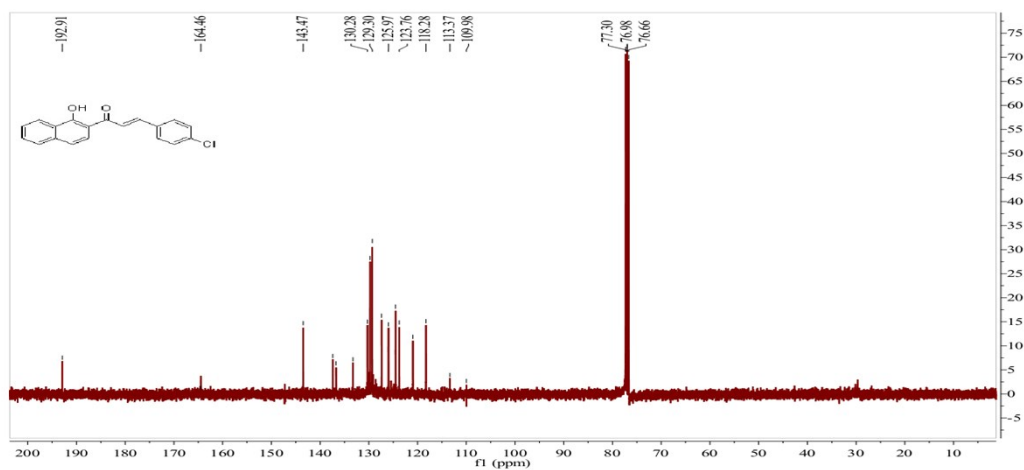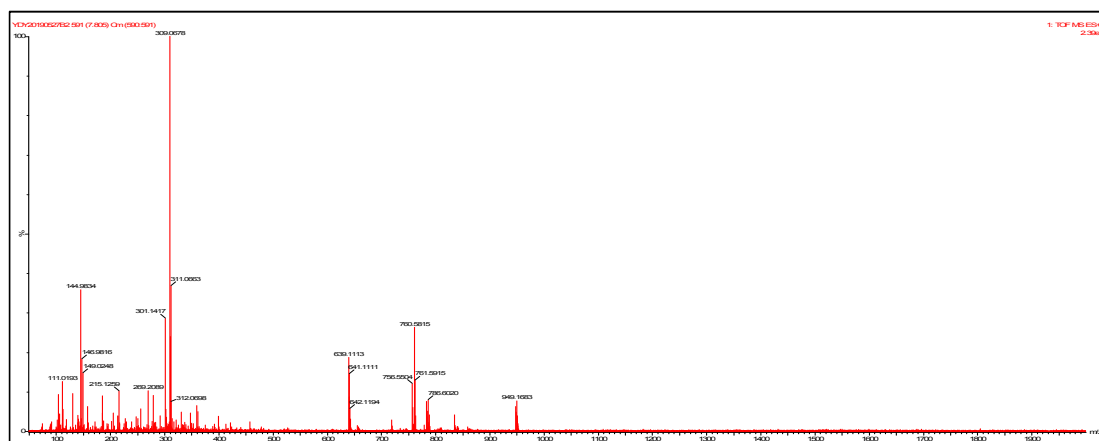

# Compound 8

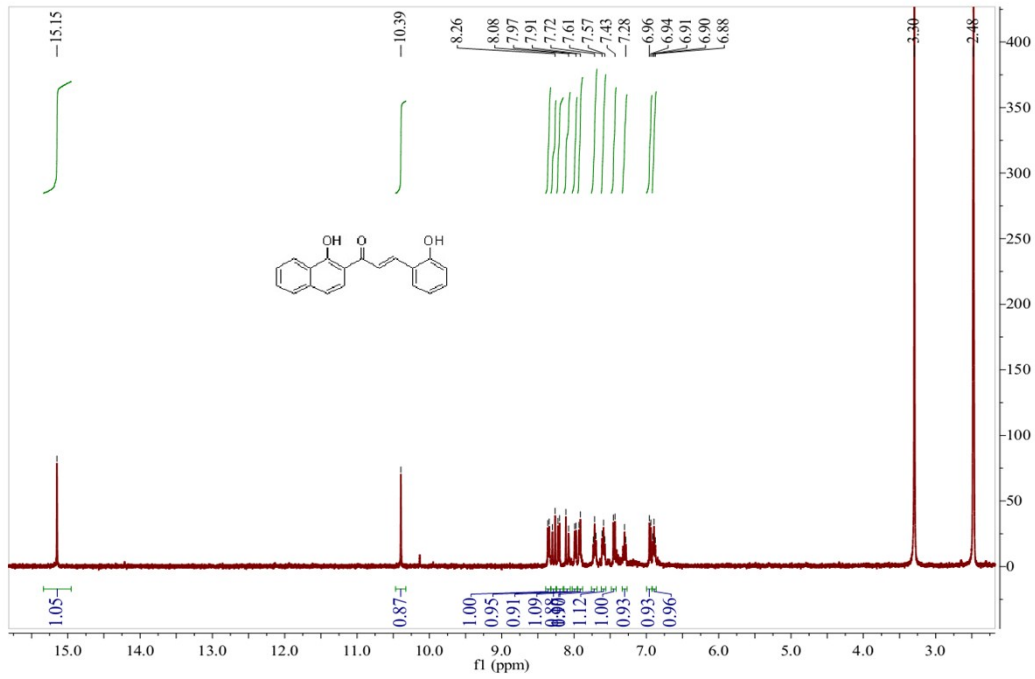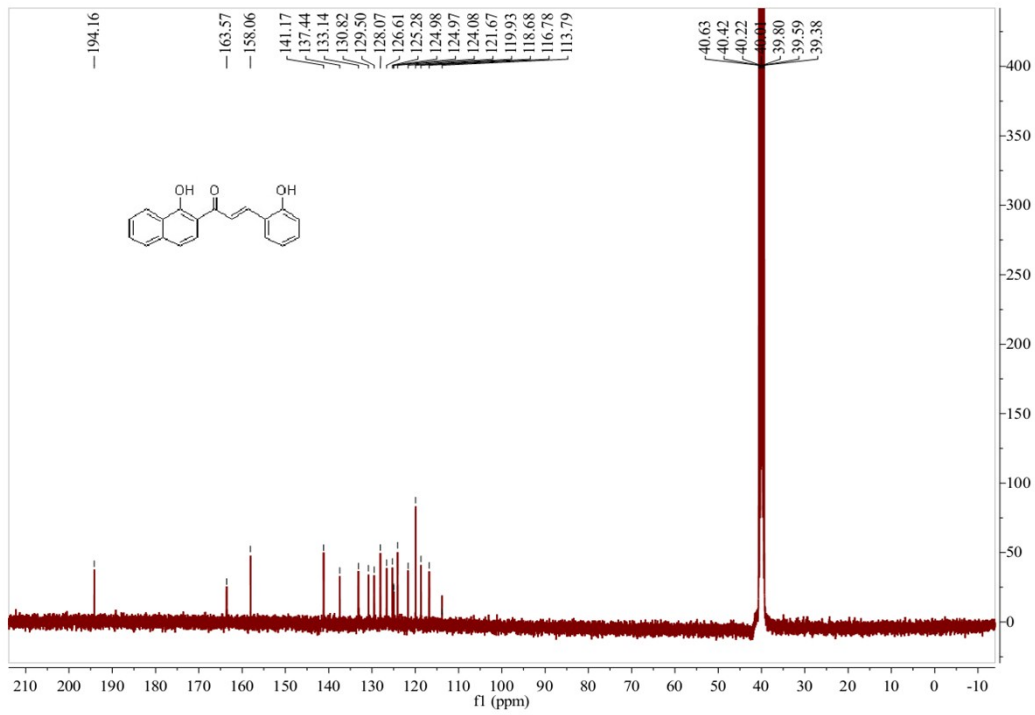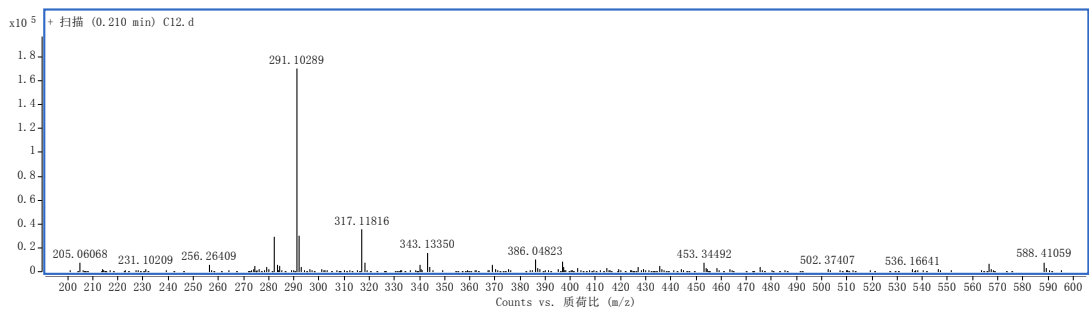



# Compound 9

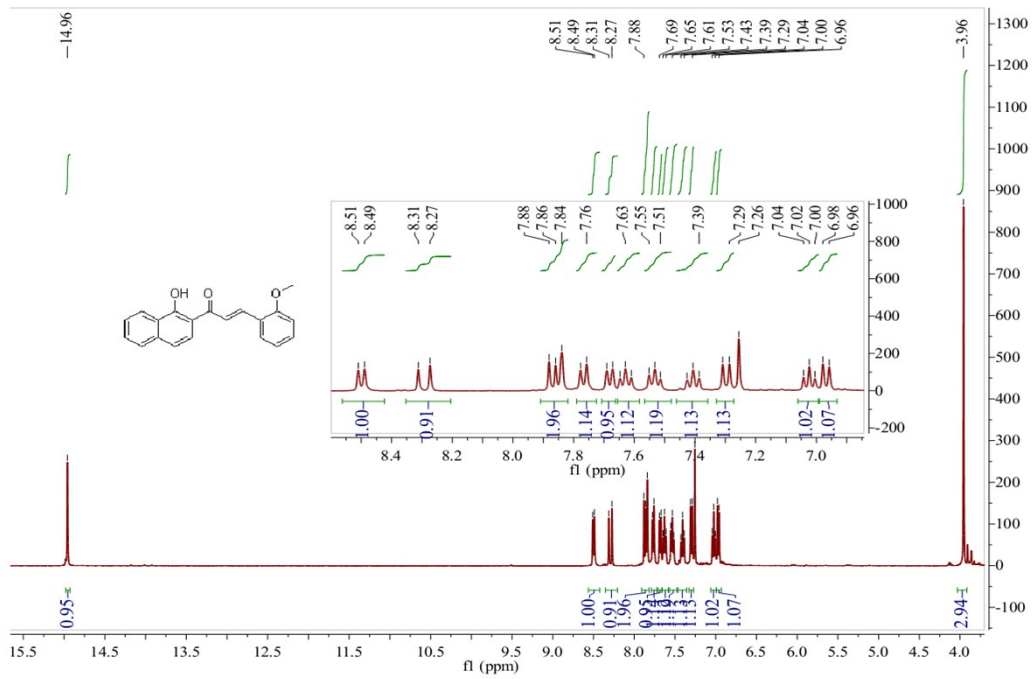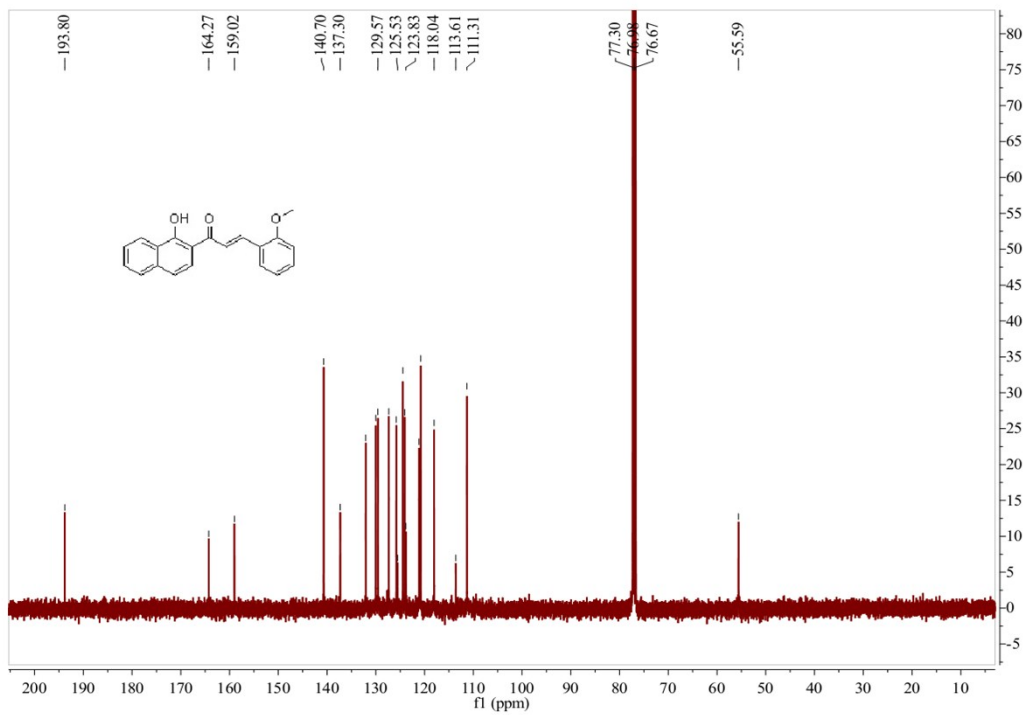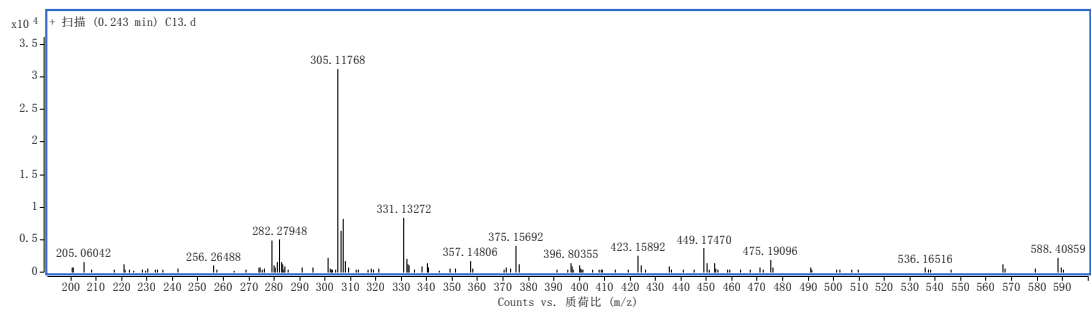

# Compound 10

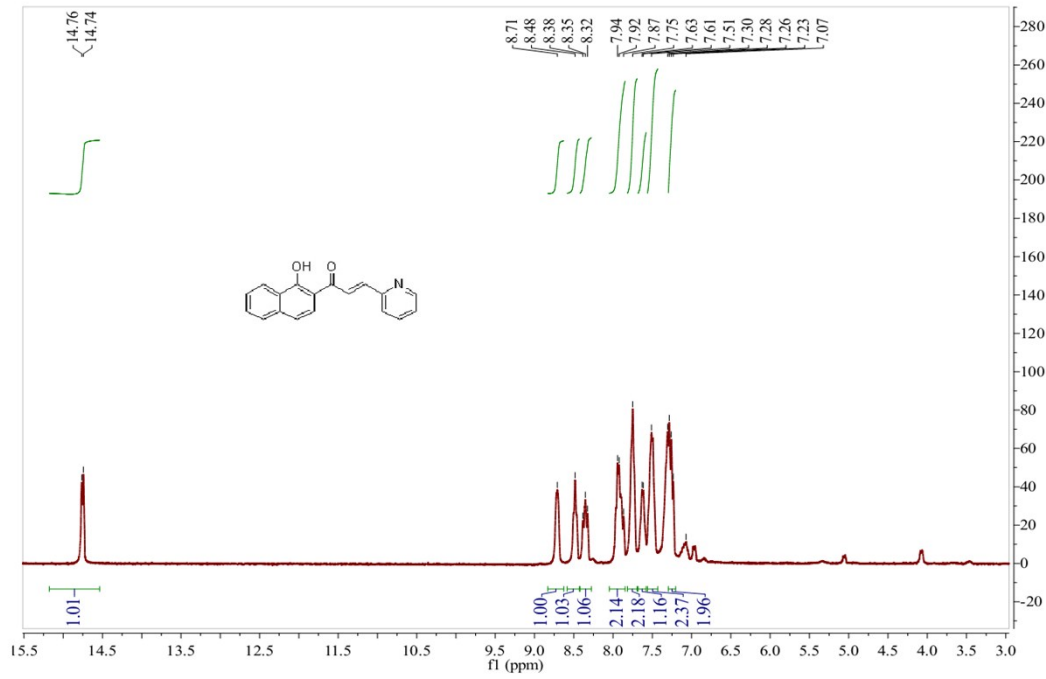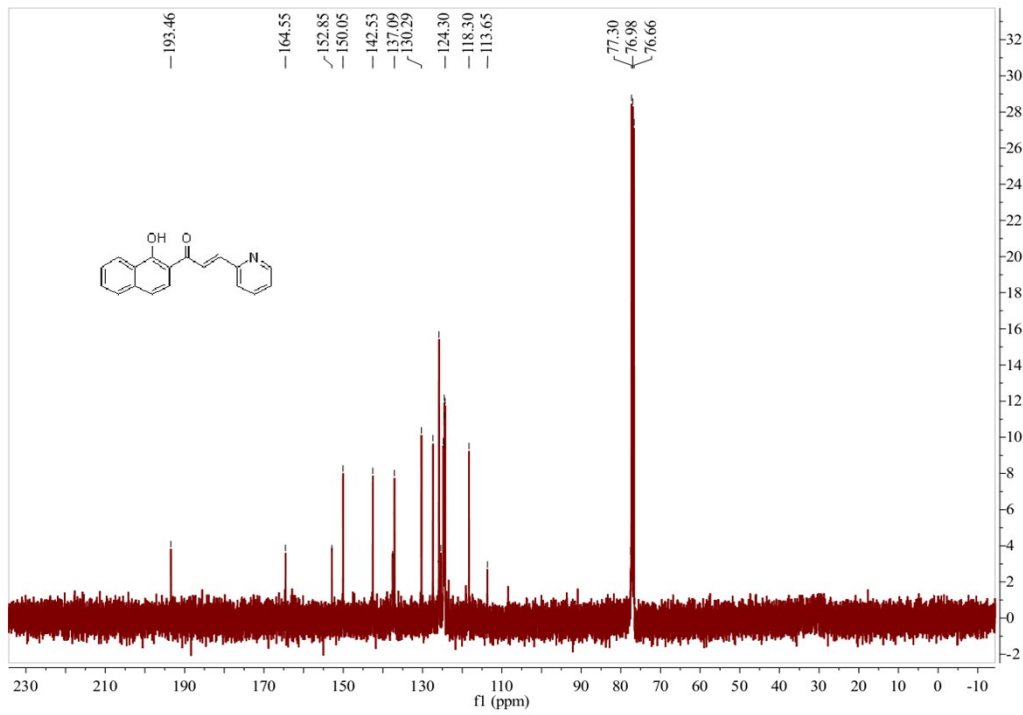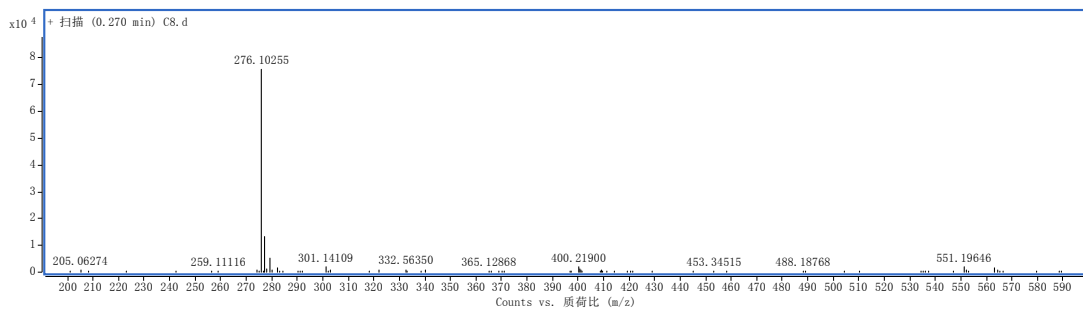

# Compound 11

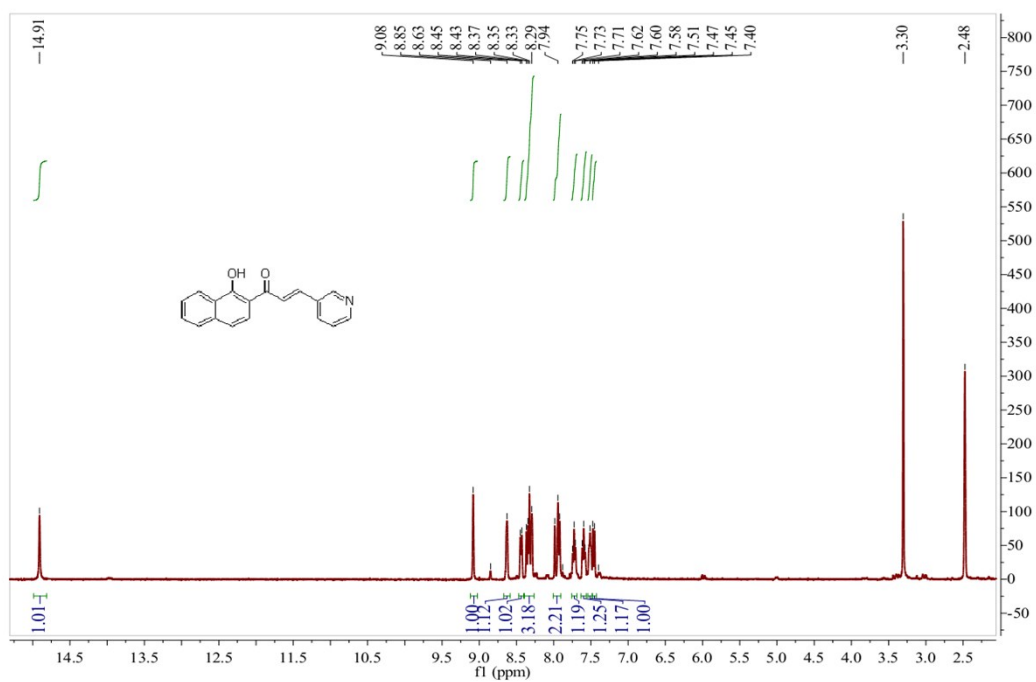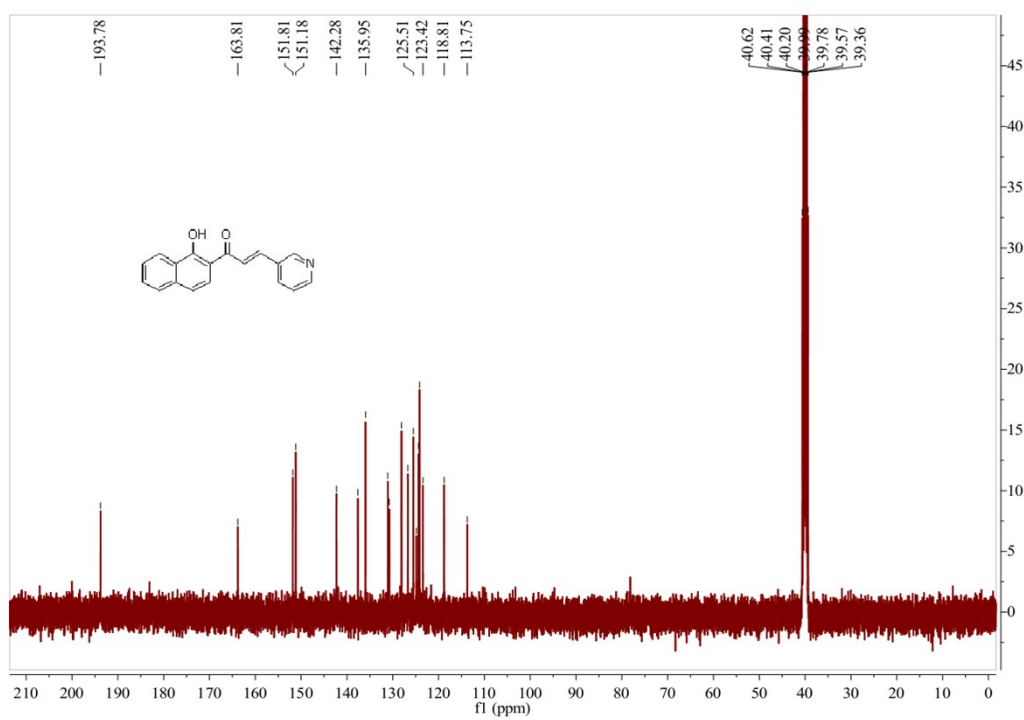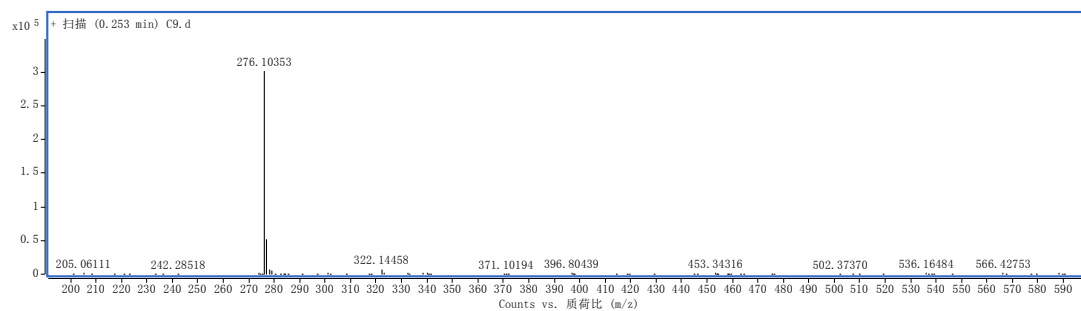

# Compound 12

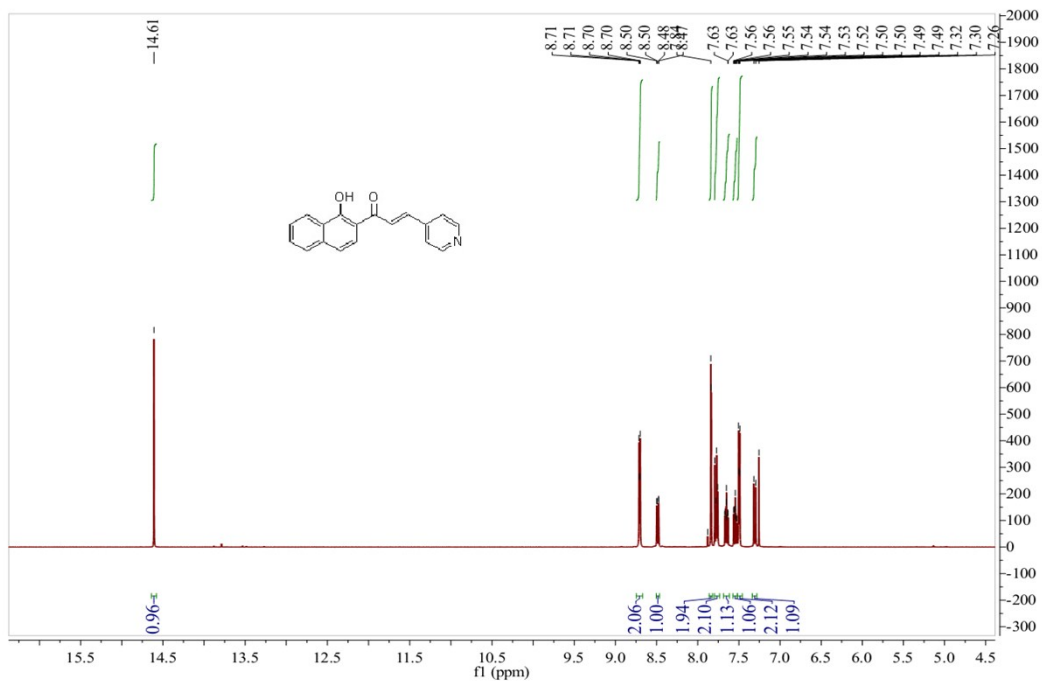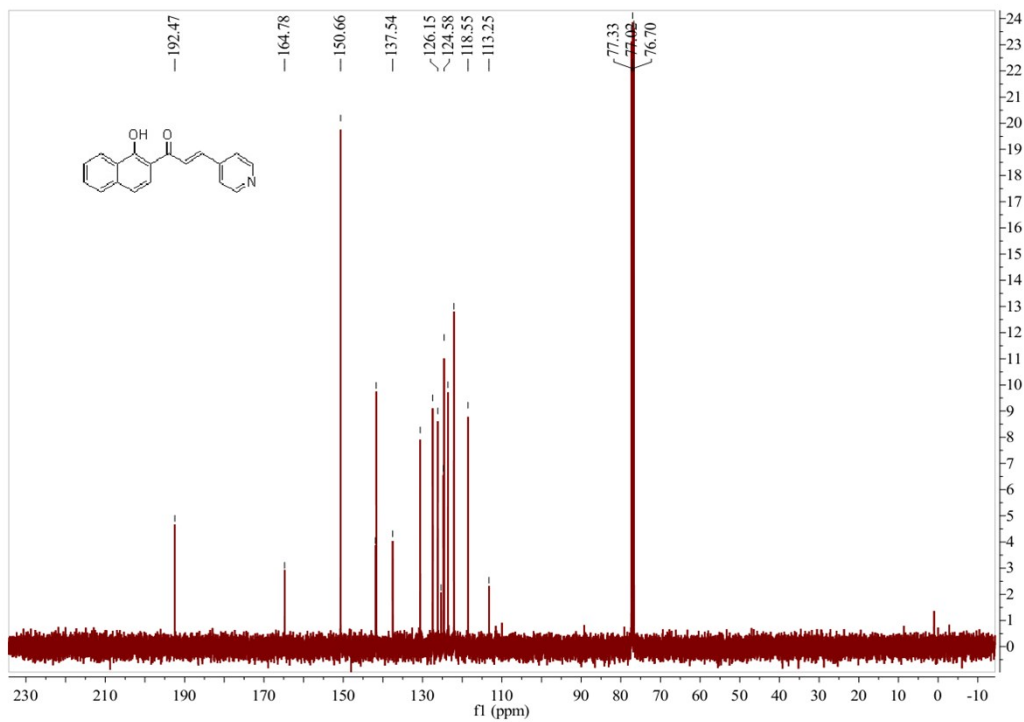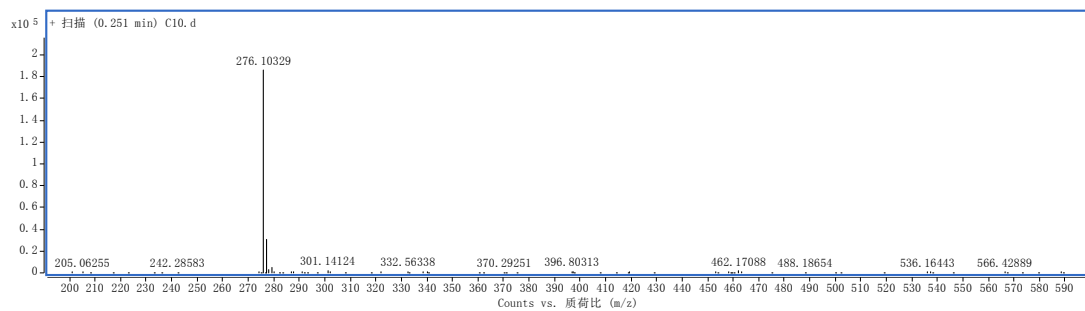

# Compound 13

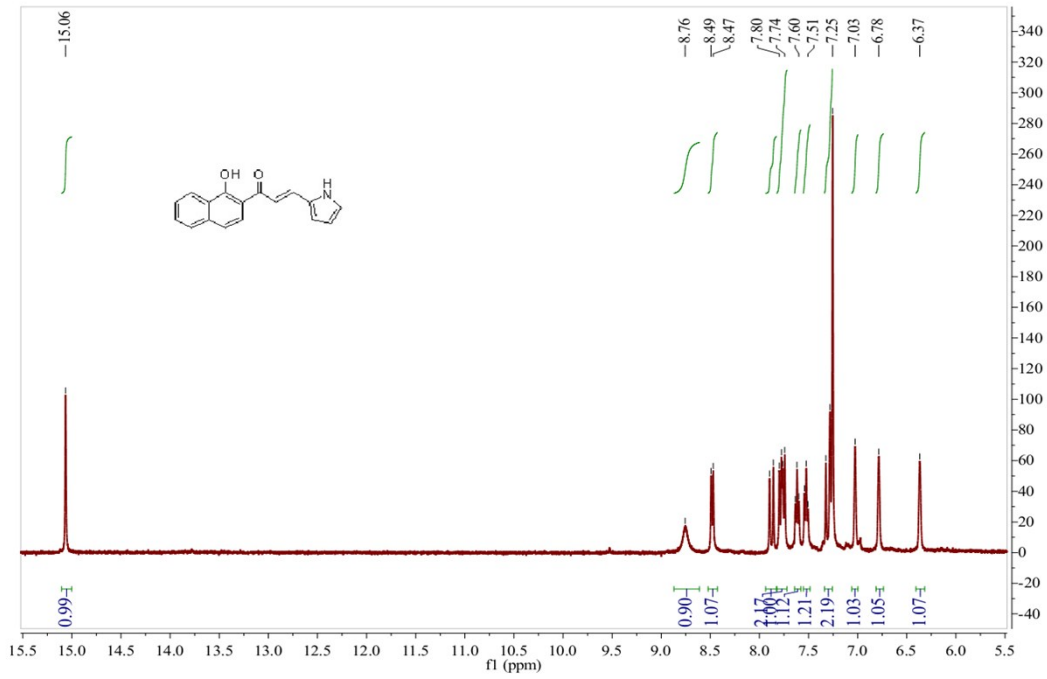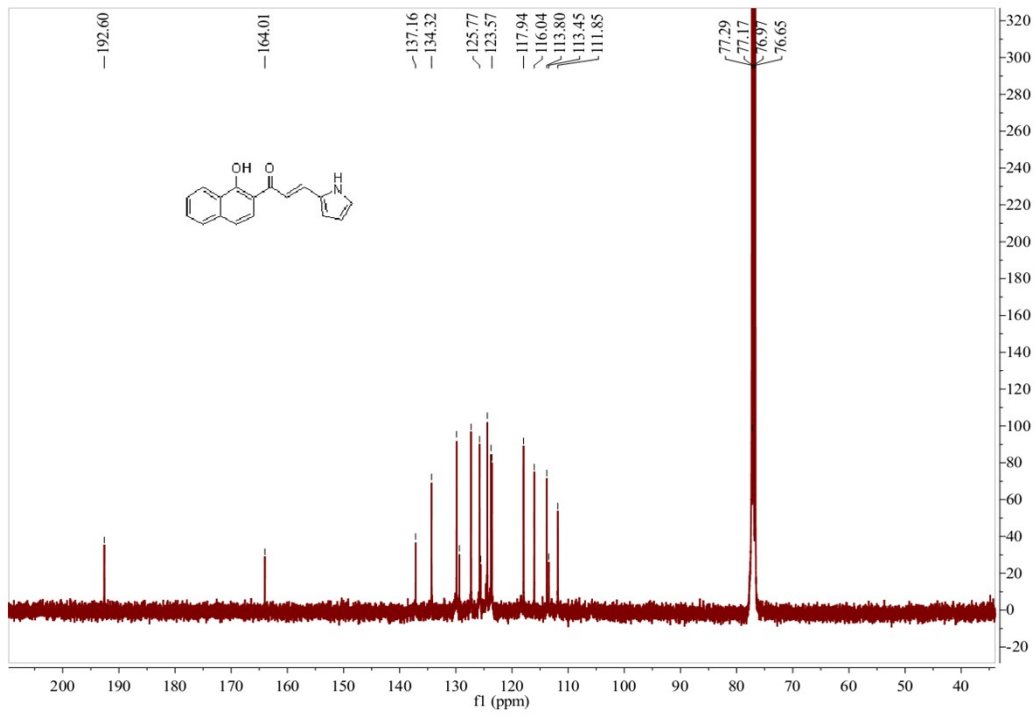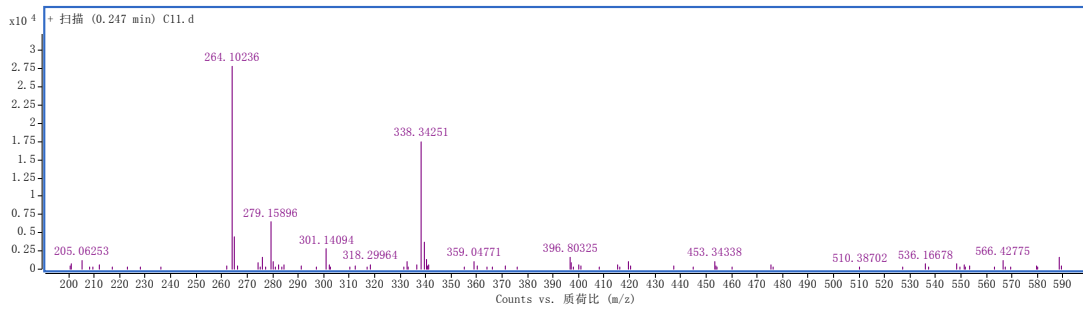

# Compound 14

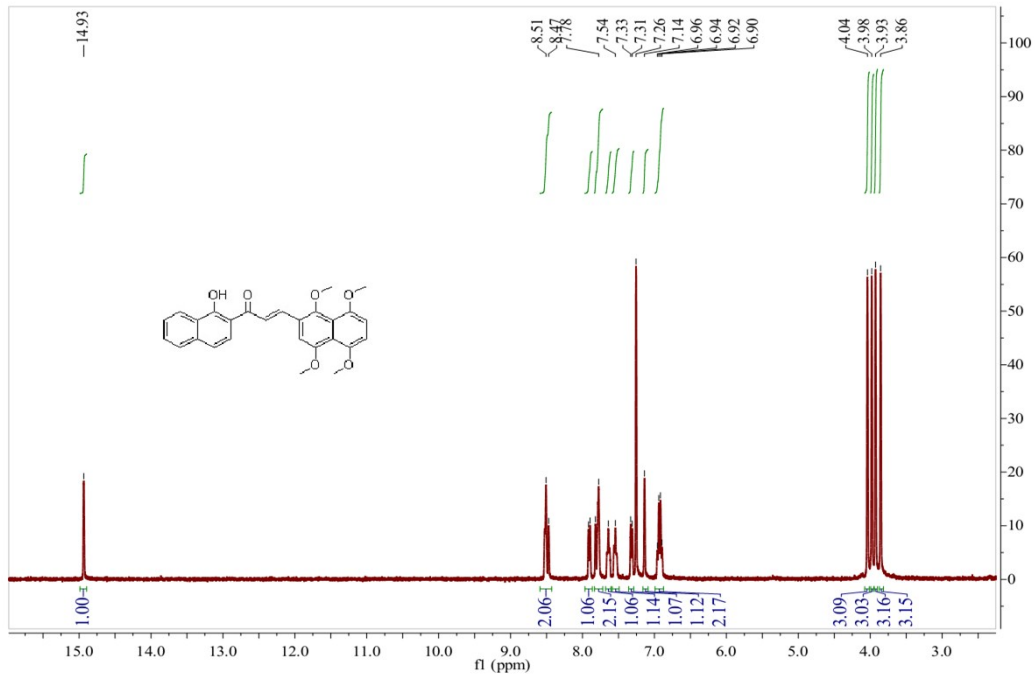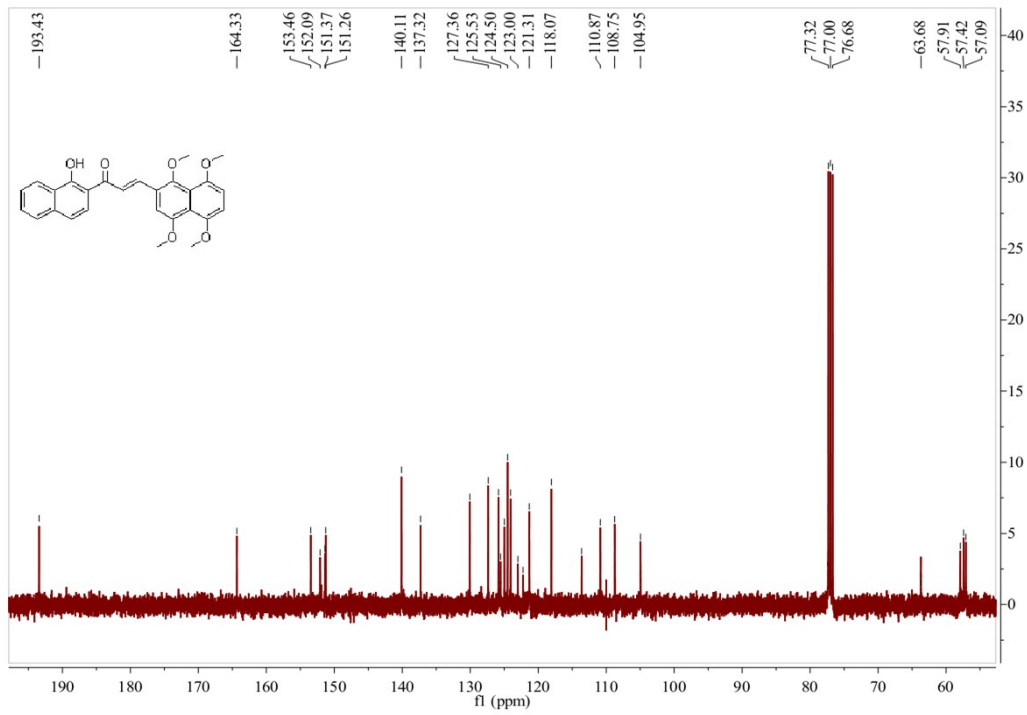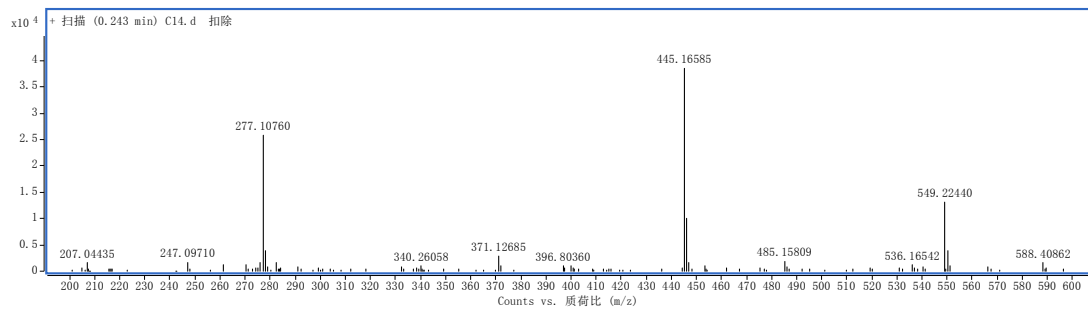

# Compound 15

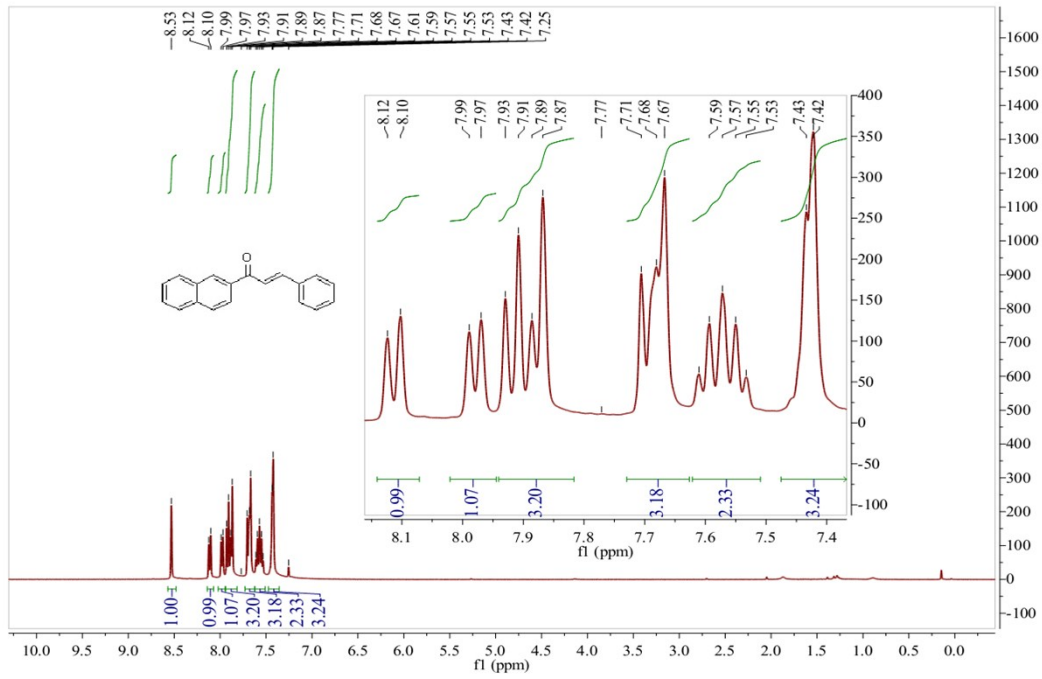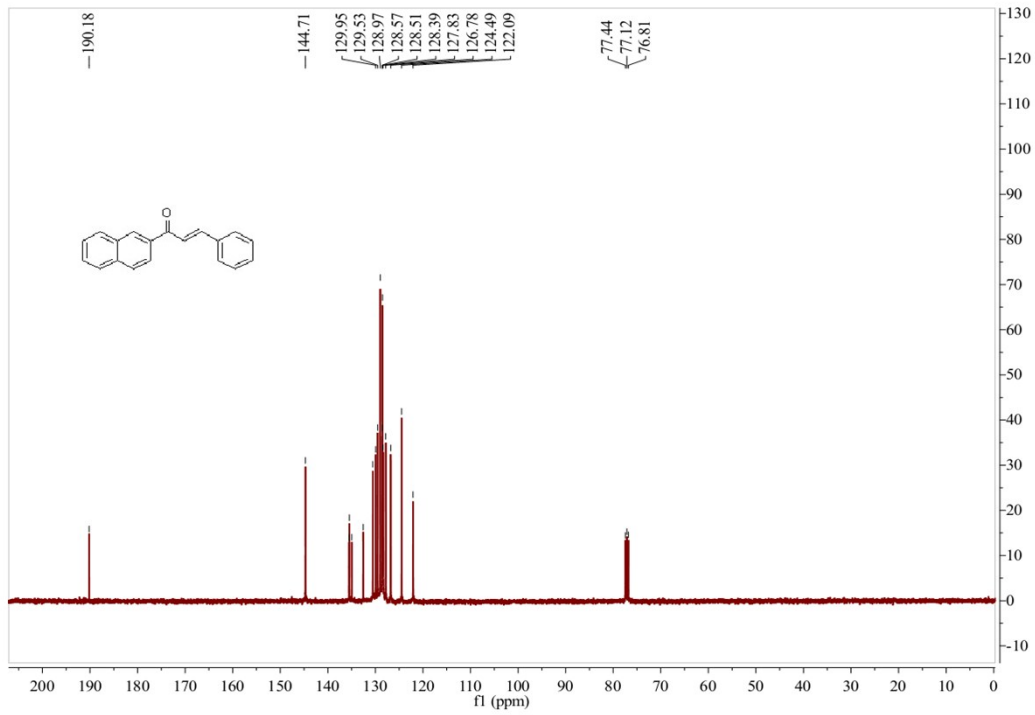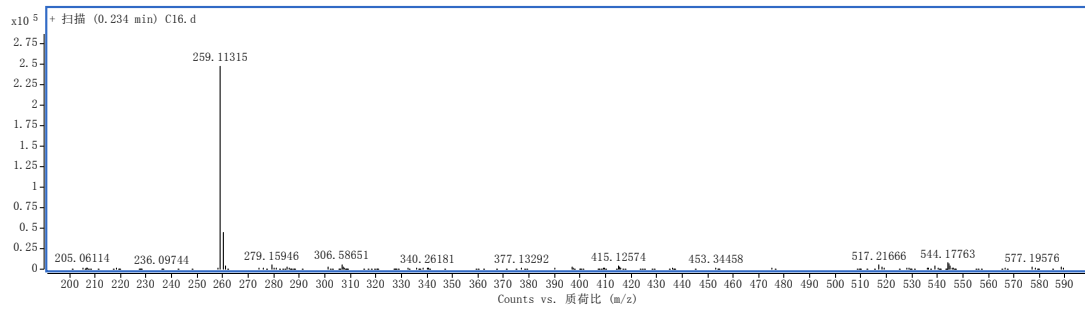

# Compound 16

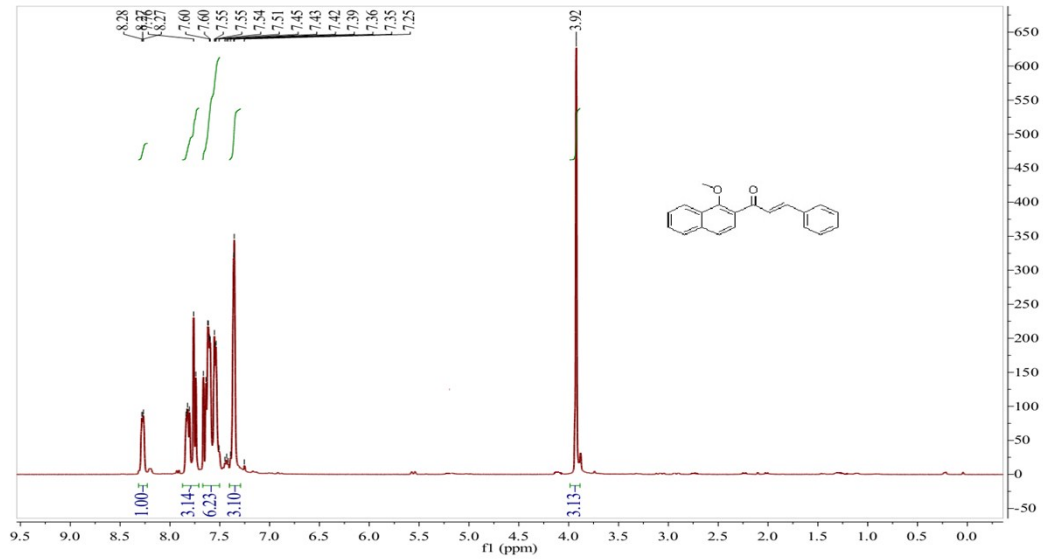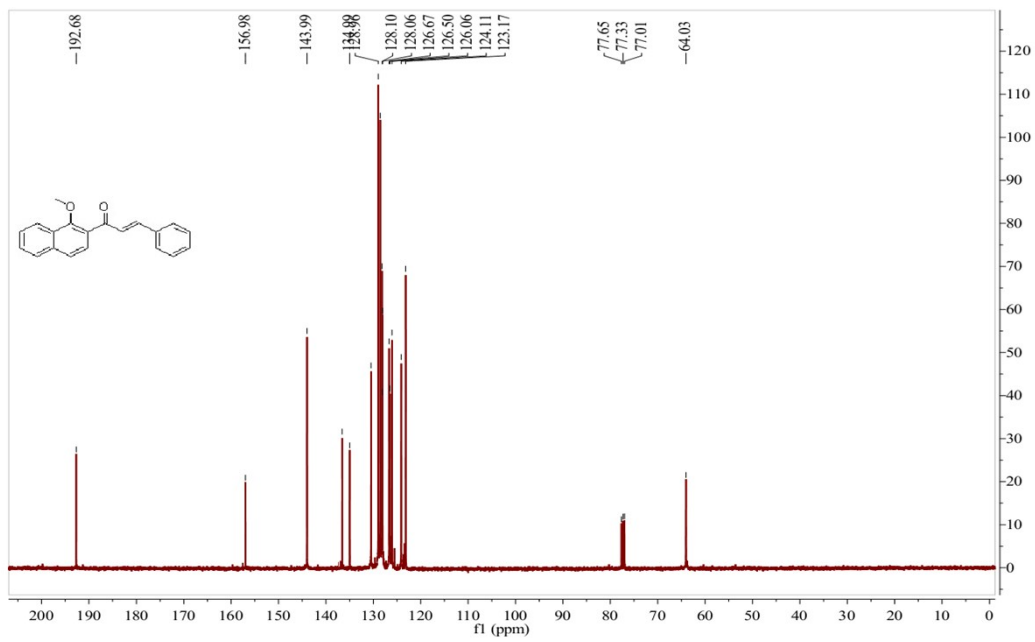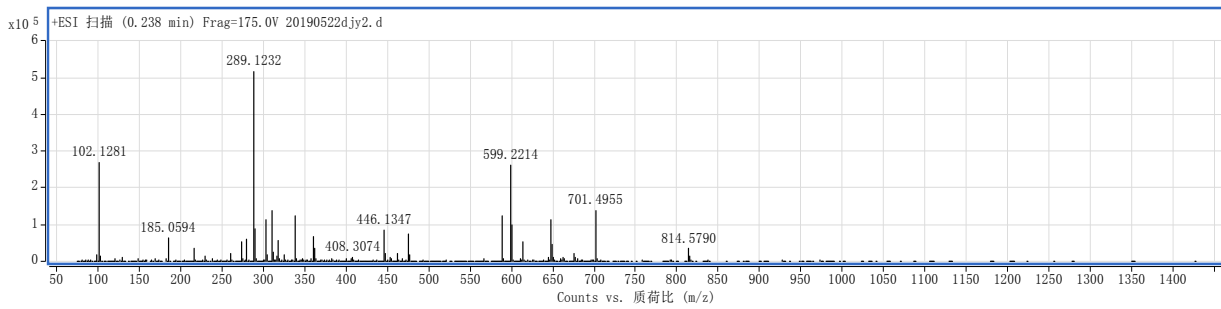



# Compound 17

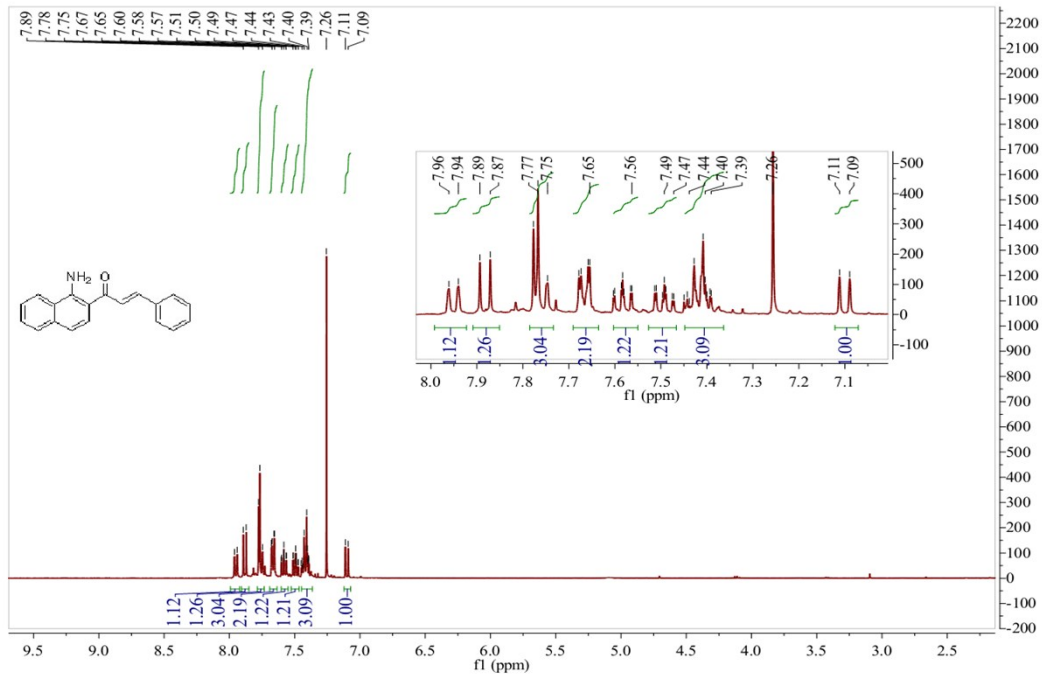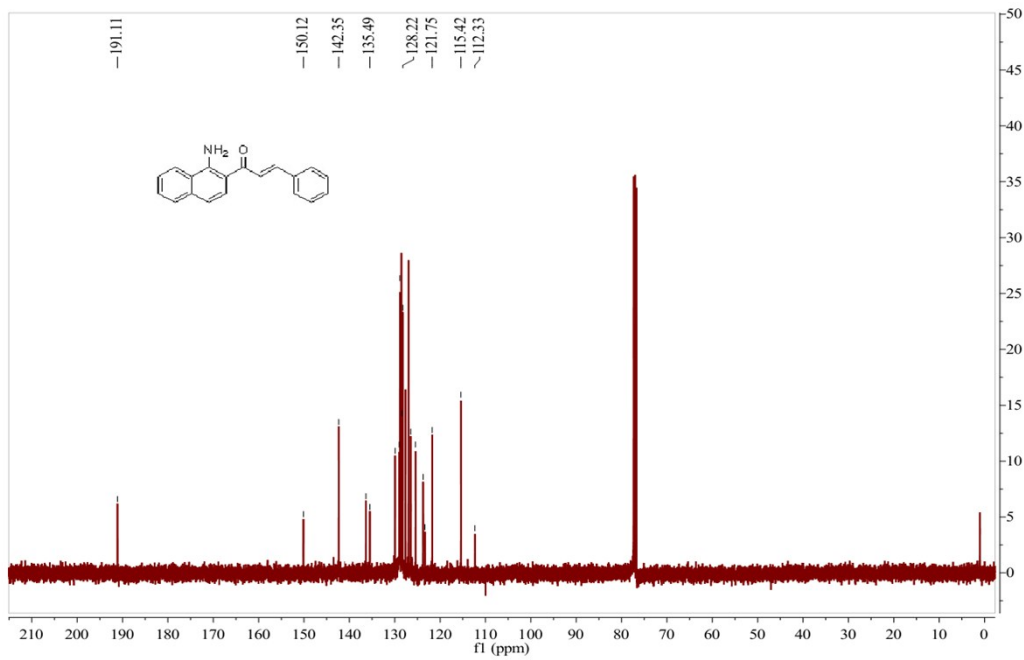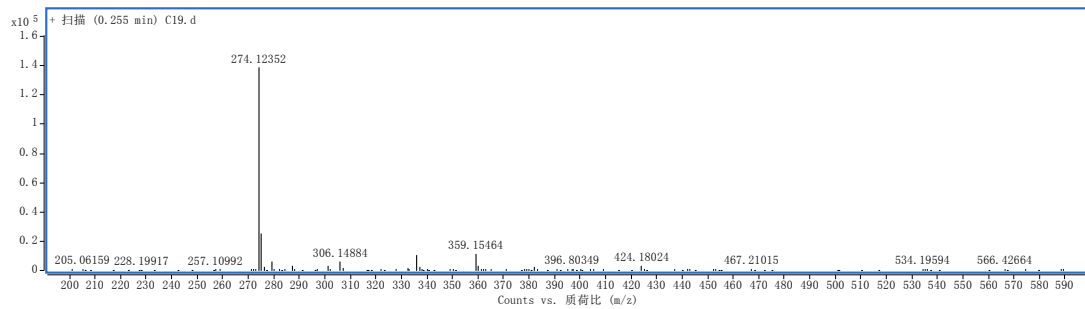

# Compound 18

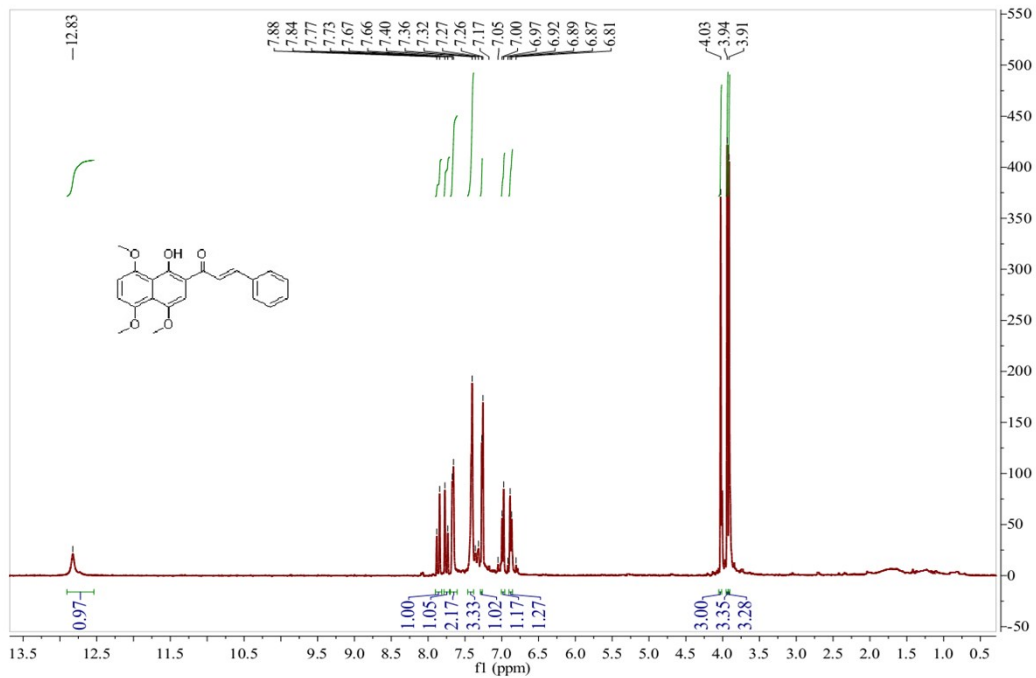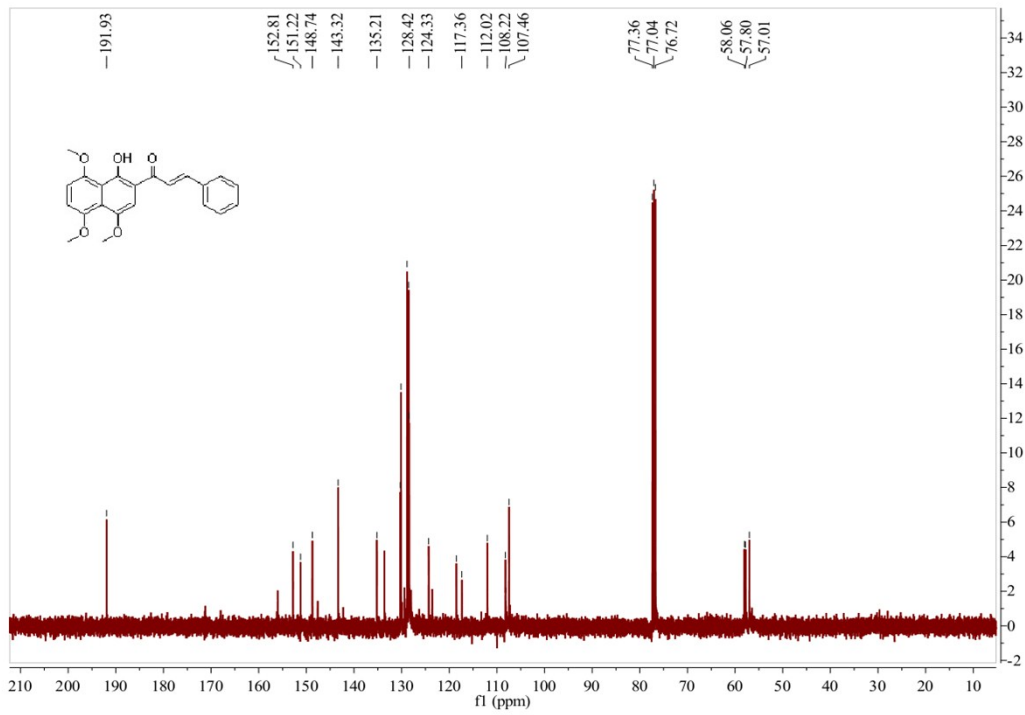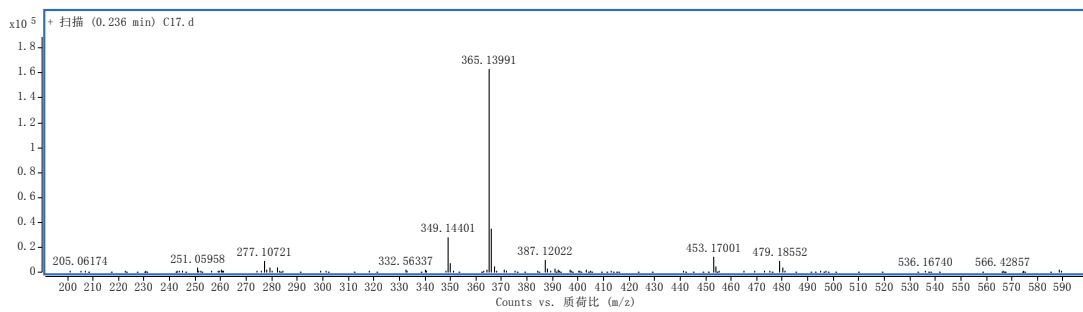

# Compound 19

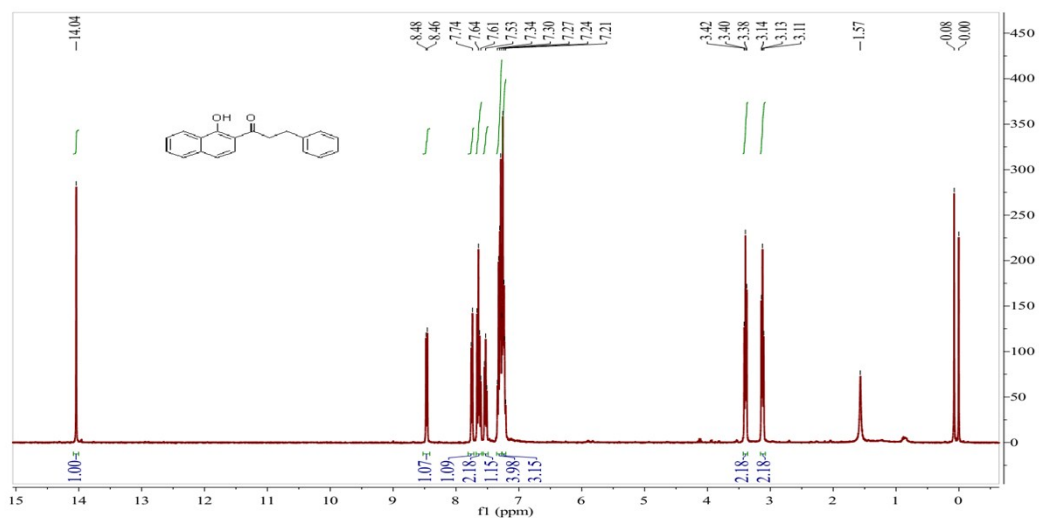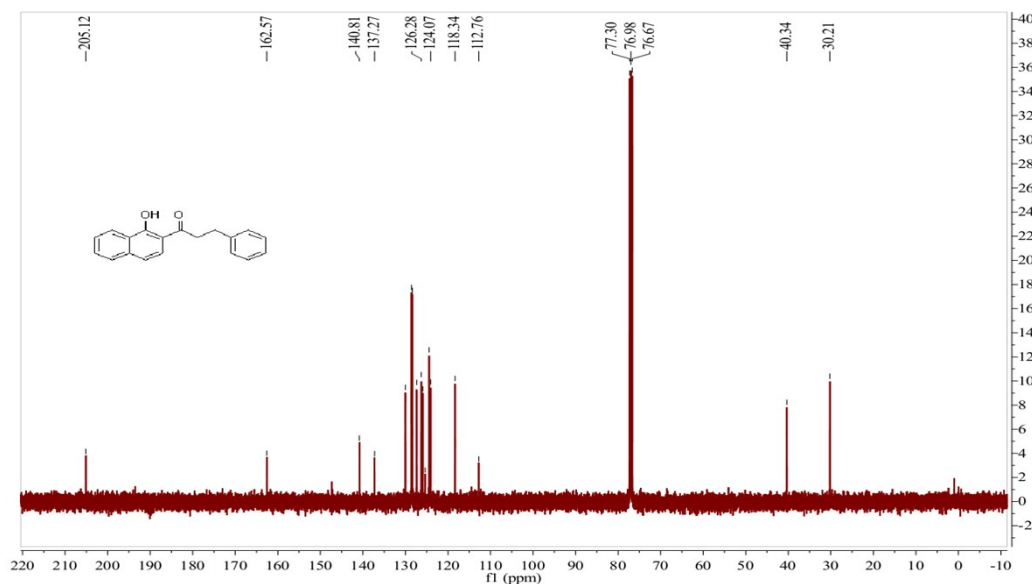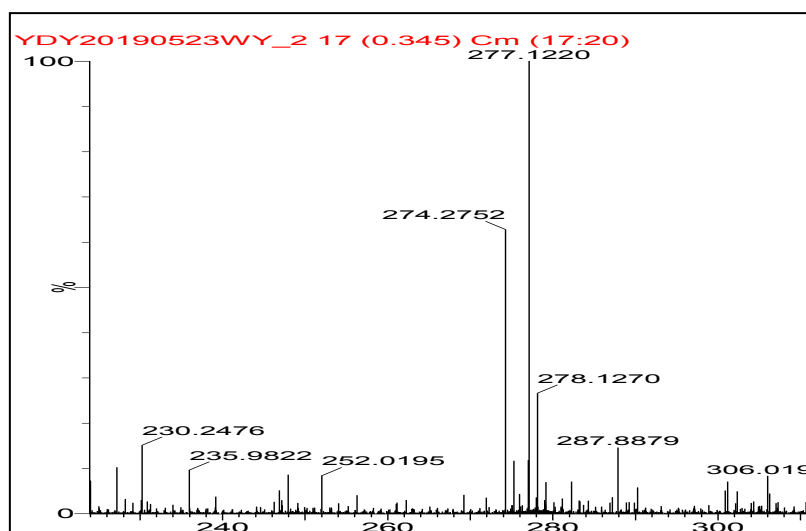

# Compound 20

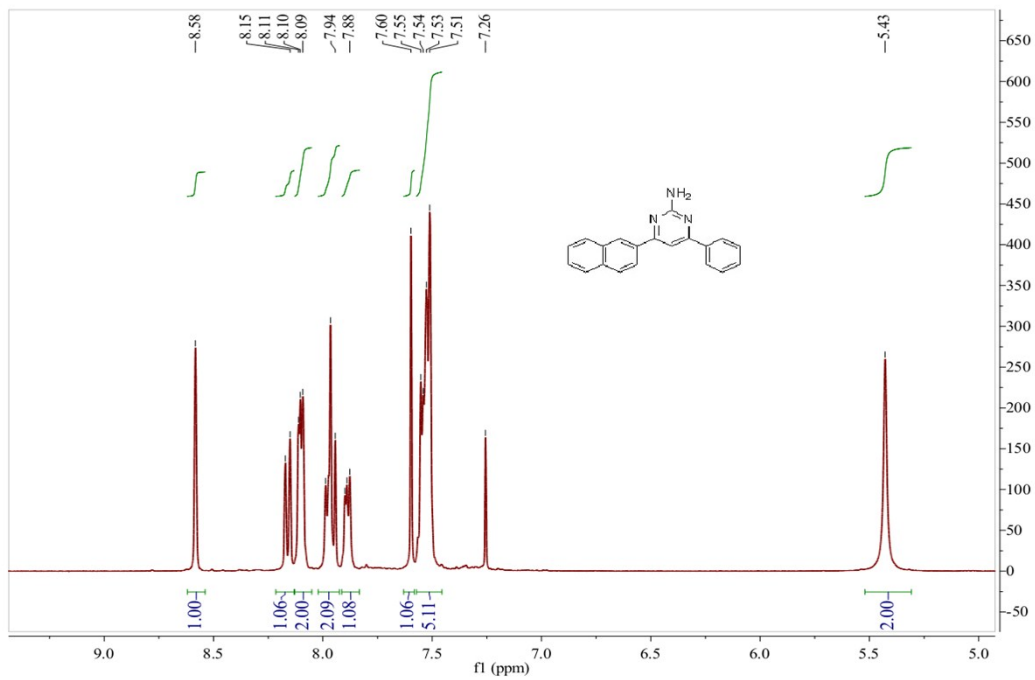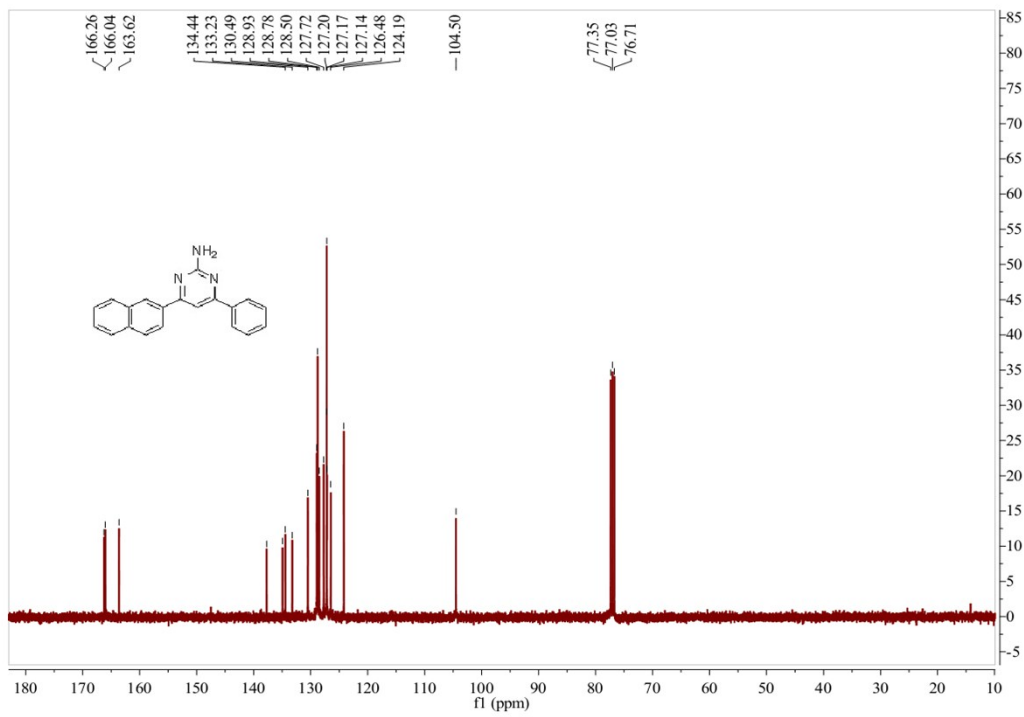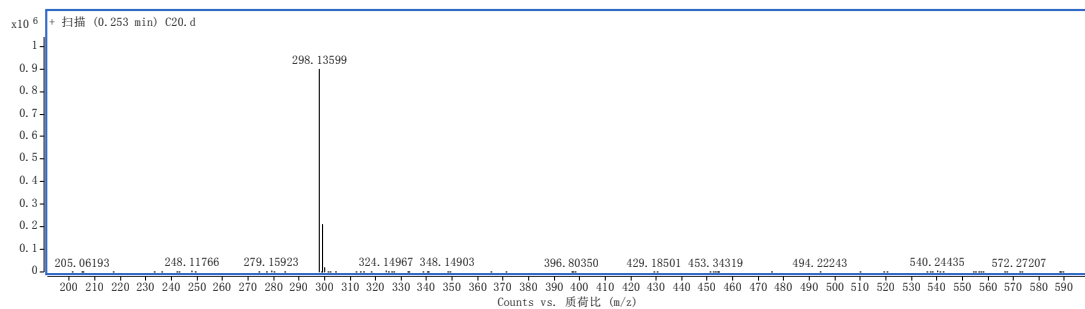

Supplement: MD-010-C9MD00258H-s001.pdf [file MD-010-C9MD00258H-s001.pdf]
